# Supplementary material for: Emotion Regulation Is Associated with Anxiety, Depression and Stress in Adults with Cerebral Palsy
Source: MDPI journal article supplement (doi:10.3390/jcm12072527), 2023-03-28
Supplement: s1 [file s1]

# Data Dictionary Codebook

19-01-2023 3:27pm

| #                                                                                                                                                              | Variable / Field Name                                                                    | Field Label<br><i>Field Note</i>                          | Field Attributes (Field Type, Validation, Choices, Calculations, etc.)                                                                                                                                                                                                                                                                                                                                                                                                      |   |                                                |   |                                         |   |                                         |   |                                               |   |                                        |   |                                                       |   |                       |
|----------------------------------------------------------------------------------------------------------------------------------------------------------------|------------------------------------------------------------------------------------------|-----------------------------------------------------------|-----------------------------------------------------------------------------------------------------------------------------------------------------------------------------------------------------------------------------------------------------------------------------------------------------------------------------------------------------------------------------------------------------------------------------------------------------------------------------|---|------------------------------------------------|---|-----------------------------------------|---|-----------------------------------------|---|-----------------------------------------------|---|----------------------------------------|---|-------------------------------------------------------|---|-----------------------|
| Instrument: <b>Emotion Regulation</b> (emotion_regulation)  Enabled as survey |                                                                                          |                                                           |                                                                                                                                                                                                                                                                                                                                                                                                                                                                             |   |                                                |   |                                         |   |                                         |   |                                               |   |                                        |   |                                                       |   |                       |
| 1                                                                                                                                                              | [ record_id ]                                                                            | Record ID                                                 | text                                                                                                                                                                                                                                                                                                                                                                                                                                                                        |   |                                                |   |                                         |   |                                         |   |                                               |   |                                        |   |                                                       |   |                       |
| 2                                                                                                                                                              | [ consent ]                                                                              | Section Header:<br>I consent to participate in this study | radio<br><table><tr><td>1</td><td>Yes</td></tr><tr><td>0</td><td>No</td></tr></table>                                                                                                                                                                                                                                                                                                                                                                                       | 1 | Yes                                            | 0 | No                                      |   |                                         |   |                                               |   |                                        |   |                                                       |   |                       |
| 1                                                                                                                                                              | Yes                                                                                      |                                                           |                                                                                                                                                                                                                                                                                                                                                                                                                                                                             |   |                                                |   |                                         |   |                                         |   |                                               |   |                                        |   |                                                       |   |                       |
| 0                                                                                                                                                              | No                                                                                       |                                                           |                                                                                                                                                                                                                                                                                                                                                                                                                                                                             |   |                                                |   |                                         |   |                                         |   |                                               |   |                                        |   |                                                       |   |                       |
| 3                                                                                                                                                              | [ thankyou_1 ]<br><br>Show the field ONLY if:<br>[consent] = '0'                         | Thank you for your time!                                  | descriptive                                                                                                                                                                                                                                                                                                                                                                                                                                                                 |   |                                                |   |                                         |   |                                         |   |                                               |   |                                        |   |                                                       |   |                       |
| 4                                                                                                                                                              | [ first_name ]<br><br>Show the field ONLY if:<br>[consent] = '1'                         | First name:                                               | text, Required, Identifier                                                                                                                                                                                                                                                                                                                                                                                                                                                  |   |                                                |   |                                         |   |                                         |   |                                               |   |                                        |   |                                                       |   |                       |
| 5                                                                                                                                                              | [ last_name ]<br><br>Show the field ONLY if:<br>[consent] = '1'                          | Last name:                                                | text, Identifier                                                                                                                                                                                                                                                                                                                                                                                                                                                            |   |                                                |   |                                         |   |                                         |   |                                               |   |                                        |   |                                                       |   |                       |
| 6                                                                                                                                                              | [ contact ]<br><br>Show the field ONLY if:<br>[consent] = '1'                            | Contact details (phone or email):                         | text, Required, Identifier                                                                                                                                                                                                                                                                                                                                                                                                                                                  |   |                                                |   |                                         |   |                                         |   |                                               |   |                                        |   |                                                       |   |                       |
| 7                                                                                                                                                              | [ second_contact ]<br><br>Show the field ONLY if:<br>[consent] = '1'                     | Second contact details (phone or email):                  | text, Identifier                                                                                                                                                                                                                                                                                                                                                                                                                                                            |   |                                                |   |                                         |   |                                         |   |                                               |   |                                        |   |                                                       |   |                       |
| 8                                                                                                                                                              | [ age ]<br><br>Show the field ONLY if:<br>[consent] = '1'                                | How old are you (years)?                                  | text (number), Required                                                                                                                                                                                                                                                                                                                                                                                                                                                     |   |                                                |   |                                         |   |                                         |   |                                               |   |                                        |   |                                                       |   |                       |
| 9                                                                                                                                                              | [ thankyou_3 ]<br><br>Show the field ONLY if:<br>[age] < 18 and [age] > 1                | Thank you for your time!                                  | descriptive                                                                                                                                                                                                                                                                                                                                                                                                                                                                 |   |                                                |   |                                         |   |                                         |   |                                               |   |                                        |   |                                                       |   |                       |
| 10                                                                                                                                                             | [ gender ]<br><br>Show the field ONLY if:<br>[consent] = '1' and [age] >= 18             | What is your sex?                                         | radio, Required<br><table><tr><td>1</td><td>Male</td></tr><tr><td>2</td><td>Female</td></tr><tr><td>3</td><td>Other</td></tr></table>                                                                                                                                                                                                                                                                                                                                       | 1 | Male                                           | 2 | Female                                  | 3 | Other                                   |   |                                               |   |                                        |   |                                                       |   |                       |
| 1                                                                                                                                                              | Male                                                                                     |                                                           |                                                                                                                                                                                                                                                                                                                                                                                                                                                                             |   |                                                |   |                                         |   |                                         |   |                                               |   |                                        |   |                                                       |   |                       |
| 2                                                                                                                                                              | Female                                                                                   |                                                           |                                                                                                                                                                                                                                                                                                                                                                                                                                                                             |   |                                                |   |                                         |   |                                         |   |                                               |   |                                        |   |                                                       |   |                       |
| 3                                                                                                                                                              | Other                                                                                    |                                                           |                                                                                                                                                                                                                                                                                                                                                                                                                                                                             |   |                                                |   |                                         |   |                                         |   |                                               |   |                                        |   |                                                       |   |                       |
| 11                                                                                                                                                             | [ post_code ]<br><br>Show the field ONLY if:<br>[consent] = '1' and [age] >= 18          | What is your residential postcode?                        | text (postalcode_australia)                                                                                                                                                                                                                                                                                                                                                                                                                                                 |   |                                                |   |                                         |   |                                         |   |                                               |   |                                        |   |                                                       |   |                       |
| 12                                                                                                                                                             | [ employment_status ]<br><br>Show the field ONLY if:<br>[consent] = '1' and [age] >= 18  | What is your employment status?                           | dropdown<br><table><tr><td>1</td><td>I am paid to work full-time (35+ hours a week)</td></tr><tr><td>2</td><td>I am paid to work part-time or casually</td></tr><tr><td>3</td><td>I volunteer in an unpaid role regularly</td></tr><tr><td>4</td><td>I am a student</td></tr><tr><td>5</td><td>I am not employed but would like to be</td></tr><tr><td>6</td><td>I am not employed and I am not seeking work currently</td></tr><tr><td>7</td><td>Retired</td></tr></table> | 1 | I am paid to work full-time (35+ hours a week) | 2 | I am paid to work part-time or casually | 3 | I volunteer in an unpaid role regularly | 4 | I am a student                                | 5 | I am not employed but would like to be | 6 | I am not employed and I am not seeking work currently | 7 | Retired               |
| 1                                                                                                                                                              | I am paid to work full-time (35+ hours a week)                                           |                                                           |                                                                                                                                                                                                                                                                                                                                                                                                                                                                             |   |                                                |   |                                         |   |                                         |   |                                               |   |                                        |   |                                                       |   |                       |
| 2                                                                                                                                                              | I am paid to work part-time or casually                                                  |                                                           |                                                                                                                                                                                                                                                                                                                                                                                                                                                                             |   |                                                |   |                                         |   |                                         |   |                                               |   |                                        |   |                                                       |   |                       |
| 3                                                                                                                                                              | I volunteer in an unpaid role regularly                                                  |                                                           |                                                                                                                                                                                                                                                                                                                                                                                                                                                                             |   |                                                |   |                                         |   |                                         |   |                                               |   |                                        |   |                                                       |   |                       |
| 4                                                                                                                                                              | I am a student                                                                           |                                                           |                                                                                                                                                                                                                                                                                                                                                                                                                                                                             |   |                                                |   |                                         |   |                                         |   |                                               |   |                                        |   |                                                       |   |                       |
| 5                                                                                                                                                              | I am not employed but would like to be                                                   |                                                           |                                                                                                                                                                                                                                                                                                                                                                                                                                                                             |   |                                                |   |                                         |   |                                         |   |                                               |   |                                        |   |                                                       |   |                       |
| 6                                                                                                                                                              | I am not employed and I am not seeking work currently                                    |                                                           |                                                                                                                                                                                                                                                                                                                                                                                                                                                                             |   |                                                |   |                                         |   |                                         |   |                                               |   |                                        |   |                                                       |   |                       |
| 7                                                                                                                                                              | Retired                                                                                  |                                                           |                                                                                                                                                                                                                                                                                                                                                                                                                                                                             |   |                                                |   |                                         |   |                                         |   |                                               |   |                                        |   |                                                       |   |                       |
| 13                                                                                                                                                             | [ living_arrangement ]<br><br>Show the field ONLY if:<br>[consent] = '1' and [age] >= 18 | What is your current living arrangement?                  | dropdown<br><table><tr><td>1</td><td>I live alone (with/without children)</td></tr><tr><td>2</td><td>I live in a share house</td></tr><tr><td>3</td><td>I live in supported accommodation</td></tr><tr><td>4</td><td>I live with my spouse (with/without children)</td></tr><tr><td>5</td><td>I live with my parents</td></tr><tr><td>6</td><td>I live with a family member</td></tr><tr><td>7</td><td>Other: Please specify</td></tr></table>                              | 1 | I live alone (with/without children)           | 2 | I live in a share house                 | 3 | I live in supported accommodation       | 4 | I live with my spouse (with/without children) | 5 | I live with my parents                 | 6 | I live with a family member                           | 7 | Other: Please specify |
| 1                                                                                                                                                              | I live alone (with/without children)                                                     |                                                           |                                                                                                                                                                                                                                                                                                                                                                                                                                                                             |   |                                                |   |                                         |   |                                         |   |                                               |   |                                        |   |                                                       |   |                       |
| 2                                                                                                                                                              | I live in a share house                                                                  |                                                           |                                                                                                                                                                                                                                                                                                                                                                                                                                                                             |   |                                                |   |                                         |   |                                         |   |                                               |   |                                        |   |                                                       |   |                       |
| 3                                                                                                                                                              | I live in supported accommodation                                                        |                                                           |                                                                                                                                                                                                                                                                                                                                                                                                                                                                             |   |                                                |   |                                         |   |                                         |   |                                               |   |                                        |   |                                                       |   |                       |
| 4                                                                                                                                                              | I live with my spouse (with/without children)                                            |                                                           |                                                                                                                                                                                                                                                                                                                                                                                                                                                                             |   |                                                |   |                                         |   |                                         |   |                                               |   |                                        |   |                                                       |   |                       |
| 5                                                                                                                                                              | I live with my parents                                                                   |                                                           |                                                                                                                                                                                                                                                                                                                                                                                                                                                                             |   |                                                |   |                                         |   |                                         |   |                                               |   |                                        |   |                                                       |   |                       |
| 6                                                                                                                                                              | I live with a family member                                                              |                                                           |                                                                                                                                                                                                                                                                                                                                                                                                                                                                             |   |                                                |   |                                         |   |                                         |   |                                               |   |                                        |   |                                                       |   |                       |
| 7                                                                                                                                                              | Other: Please specify                                                                    |                                                           |                                                                                                                                                                                                                                                                                                                                                                                                                                                                             |   |                                                |   |                                         |   |                                         |   |                                               |   |                                        |   |                                                       |   |                       |

|    |                                                                                                                     |                                                                                                |                                                                                                                                                                                                                                                                                                                                                                                                                                                                                                                                                                                                                 |   |                                                                                                      |   |                                                                               |   |                                                            |   |                                                                          |   |                                                                                                             |   |                                       |   |       |
|----|---------------------------------------------------------------------------------------------------------------------|------------------------------------------------------------------------------------------------|-----------------------------------------------------------------------------------------------------------------------------------------------------------------------------------------------------------------------------------------------------------------------------------------------------------------------------------------------------------------------------------------------------------------------------------------------------------------------------------------------------------------------------------------------------------------------------------------------------------------|---|------------------------------------------------------------------------------------------------------|---|-------------------------------------------------------------------------------|---|------------------------------------------------------------|---|--------------------------------------------------------------------------|---|-------------------------------------------------------------------------------------------------------------|---|---------------------------------------|---|-------|
| 14 | [ <b>living_arrangement_comment</b> ]<br>Show the field ONLY if:<br>[living_arrangement] = '7'                      | Please specify other living arrangements                                                       | notes                                                                                                                                                                                                                                                                                                                                                                                                                                                                                                                                                                                                           |   |                                                                                                      |   |                                                                               |   |                                                            |   |                                                                          |   |                                                                                                             |   |                                       |   |       |
| 15 | [ <b>children</b> ]<br>Show the field ONLY if:<br>[consent] = '1' and [age] >= 18                                   | Do you have any children?                                                                      | radio<br><table border="1"> <tr> <td>0</td> <td>No</td> </tr> <tr> <td>1</td> <td>Yes</td> </tr> </table>                                                                                                                                                                                                                                                                                                                                                                                                                                                                                                       | 0 | No                                                                                                   | 1 | Yes                                                                           |   |                                                            |   |                                                                          |   |                                                                                                             |   |                                       |   |       |
| 0  | No                                                                                                                  |                                                                                                |                                                                                                                                                                                                                                                                                                                                                                                                                                                                                                                                                                                                                 |   |                                                                                                      |   |                                                                               |   |                                                            |   |                                                                          |   |                                                                                                             |   |                                       |   |       |
| 1  | Yes                                                                                                                 |                                                                                                |                                                                                                                                                                                                                                                                                                                                                                                                                                                                                                                                                                                                                 |   |                                                                                                      |   |                                                                               |   |                                                            |   |                                                                          |   |                                                                                                             |   |                                       |   |       |
| 16 | [ <b>support_received</b> ]<br>Show the field ONLY if:<br>[consent] = '1' and [age] >= 18                           | Have you received care and/or support services?                                                | dropdown<br><table border="1"> <tr> <td>1</td> <td>I receive/d routine care/services to assist me with my daily living activities</td> </tr> <tr> <td>0</td> <td>I have not receive/d any routine care to assist in my daily living activities</td> </tr> </table>                                                                                                                                                                                                                                                                                                                                              | 1 | I receive/d routine care/services to assist me with my daily living activities                       | 0 | I have not receive/d any routine care to assist in my daily living activities |   |                                                            |   |                                                                          |   |                                                                                                             |   |                                       |   |       |
| 1  | I receive/d routine care/services to assist me with my daily living activities                                      |                                                                                                |                                                                                                                                                                                                                                                                                                                                                                                                                                                                                                                                                                                                                 |   |                                                                                                      |   |                                                                               |   |                                                            |   |                                                                          |   |                                                                                                             |   |                                       |   |       |
| 0  | I have not receive/d any routine care to assist in my daily living activities                                       |                                                                                                |                                                                                                                                                                                                                                                                                                                                                                                                                                                                                                                                                                                                                 |   |                                                                                                      |   |                                                                               |   |                                                            |   |                                                                          |   |                                                                                                             |   |                                       |   |       |
| 17 | [ <b>support_person</b> ]<br>Show the field ONLY if:<br>[consent] = '1' and [age] >= 18                             | Who is your primary support person?                                                            | dropdown<br><table border="1"> <tr> <td>1</td> <td>Partner/spouse</td> </tr> <tr> <td>2</td> <td>Parent</td> </tr> <tr> <td>3</td> <td>Friend</td> </tr> <tr> <td>4</td> <td>Sibling</td> </tr> <tr> <td>5</td> <td>Case worker/advocate</td> </tr> <tr> <td>6</td> <td>I don't have a primary support person</td> </tr> <tr> <td>7</td> <td>Other</td> </tr> </table>                                                                                                                                                                                                                                          | 1 | Partner/spouse                                                                                       | 2 | Parent                                                                        | 3 | Friend                                                     | 4 | Sibling                                                                  | 5 | Case worker/advocate                                                                                        | 6 | I don't have a primary support person | 7 | Other |
| 1  | Partner/spouse                                                                                                      |                                                                                                |                                                                                                                                                                                                                                                                                                                                                                                                                                                                                                                                                                                                                 |   |                                                                                                      |   |                                                                               |   |                                                            |   |                                                                          |   |                                                                                                             |   |                                       |   |       |
| 2  | Parent                                                                                                              |                                                                                                |                                                                                                                                                                                                                                                                                                                                                                                                                                                                                                                                                                                                                 |   |                                                                                                      |   |                                                                               |   |                                                            |   |                                                                          |   |                                                                                                             |   |                                       |   |       |
| 3  | Friend                                                                                                              |                                                                                                |                                                                                                                                                                                                                                                                                                                                                                                                                                                                                                                                                                                                                 |   |                                                                                                      |   |                                                                               |   |                                                            |   |                                                                          |   |                                                                                                             |   |                                       |   |       |
| 4  | Sibling                                                                                                             |                                                                                                |                                                                                                                                                                                                                                                                                                                                                                                                                                                                                                                                                                                                                 |   |                                                                                                      |   |                                                                               |   |                                                            |   |                                                                          |   |                                                                                                             |   |                                       |   |       |
| 5  | Case worker/advocate                                                                                                |                                                                                                |                                                                                                                                                                                                                                                                                                                                                                                                                                                                                                                                                                                                                 |   |                                                                                                      |   |                                                                               |   |                                                            |   |                                                                          |   |                                                                                                             |   |                                       |   |       |
| 6  | I don't have a primary support person                                                                               |                                                                                                |                                                                                                                                                                                                                                                                                                                                                                                                                                                                                                                                                                                                                 |   |                                                                                                      |   |                                                                               |   |                                                            |   |                                                                          |   |                                                                                                             |   |                                       |   |       |
| 7  | Other                                                                                                               |                                                                                                |                                                                                                                                                                                                                                                                                                                                                                                                                                                                                                                                                                                                                 |   |                                                                                                      |   |                                                                               |   |                                                            |   |                                                                          |   |                                                                                                             |   |                                       |   |       |
| 18 | [ <b>gmfcs</b> ]<br>Show the field ONLY if:<br>[consent] = '1' and [age] >= 18                                      | Mobility (Gross Motor Function Classification Scale)                                           | dropdown, Required<br><table border="1"> <tr> <td>1</td> <td>GMFCS Level I - I can walk without limitations (but I have some difficulty with running and jumping)</td> </tr> <tr> <td>2</td> <td>GMFCS Level II - I walk with some limitations</td> </tr> <tr> <td>3</td> <td>GMFCS Level III - I walk using a hand-held mobility device</td> </tr> <tr> <td>4</td> <td>GMFCS Level IV - I use wheeled mobility. I can support my head and trunk</td> </tr> <tr> <td>5</td> <td>GMFCS Level V - I use wheeled mobility. I have difficulties holding my head and trunk upright independently</td> </tr> </table> | 1 | GMFCS Level I - I can walk without limitations (but I have some difficulty with running and jumping) | 2 | GMFCS Level II - I walk with some limitations                                 | 3 | GMFCS Level III - I walk using a hand-held mobility device | 4 | GMFCS Level IV - I use wheeled mobility. I can support my head and trunk | 5 | GMFCS Level V - I use wheeled mobility. I have difficulties holding my head and trunk upright independently |   |                                       |   |       |
| 1  | GMFCS Level I - I can walk without limitations (but I have some difficulty with running and jumping)                |                                                                                                |                                                                                                                                                                                                                                                                                                                                                                                                                                                                                                                                                                                                                 |   |                                                                                                      |   |                                                                               |   |                                                            |   |                                                                          |   |                                                                                                             |   |                                       |   |       |
| 2  | GMFCS Level II - I walk with some limitations                                                                       |                                                                                                |                                                                                                                                                                                                                                                                                                                                                                                                                                                                                                                                                                                                                 |   |                                                                                                      |   |                                                                               |   |                                                            |   |                                                                          |   |                                                                                                             |   |                                       |   |       |
| 3  | GMFCS Level III - I walk using a hand-held mobility device                                                          |                                                                                                |                                                                                                                                                                                                                                                                                                                                                                                                                                                                                                                                                                                                                 |   |                                                                                                      |   |                                                                               |   |                                                            |   |                                                                          |   |                                                                                                             |   |                                       |   |       |
| 4  | GMFCS Level IV - I use wheeled mobility. I can support my head and trunk                                            |                                                                                                |                                                                                                                                                                                                                                                                                                                                                                                                                                                                                                                                                                                                                 |   |                                                                                                      |   |                                                                               |   |                                                            |   |                                                                          |   |                                                                                                             |   |                                       |   |       |
| 5  | GMFCS Level V - I use wheeled mobility. I have difficulties holding my head and trunk upright independently         |                                                                                                |                                                                                                                                                                                                                                                                                                                                                                                                                                                                                                                                                                                                                 |   |                                                                                                      |   |                                                                               |   |                                                            |   |                                                                          |   |                                                                                                             |   |                                       |   |       |
| 19 | [ <b>intellect</b> ]<br>Show the field ONLY if:<br>[consent] = '1' and [age] >= 18                                  | Do you have an intellectual impairment?                                                        | dropdown<br><table border="1"> <tr> <td>0</td> <td>No impairment</td> </tr> <tr> <td>1</td> <td>Mild</td> </tr> <tr> <td>2</td> <td>Moderate</td> </tr> <tr> <td>3</td> <td>Severe</td> </tr> <tr> <td>4</td> <td>Unknown</td> </tr> </table>                                                                                                                                                                                                                                                                                                                                                                   | 0 | No impairment                                                                                        | 1 | Mild                                                                          | 2 | Moderate                                                   | 3 | Severe                                                                   | 4 | Unknown                                                                                                     |   |                                       |   |       |
| 0  | No impairment                                                                                                       |                                                                                                |                                                                                                                                                                                                                                                                                                                                                                                                                                                                                                                                                                                                                 |   |                                                                                                      |   |                                                                               |   |                                                            |   |                                                                          |   |                                                                                                             |   |                                       |   |       |
| 1  | Mild                                                                                                                |                                                                                                |                                                                                                                                                                                                                                                                                                                                                                                                                                                                                                                                                                                                                 |   |                                                                                                      |   |                                                                               |   |                                                            |   |                                                                          |   |                                                                                                             |   |                                       |   |       |
| 2  | Moderate                                                                                                            |                                                                                                |                                                                                                                                                                                                                                                                                                                                                                                                                                                                                                                                                                                                                 |   |                                                                                                      |   |                                                                               |   |                                                            |   |                                                                          |   |                                                                                                             |   |                                       |   |       |
| 3  | Severe                                                                                                              |                                                                                                |                                                                                                                                                                                                                                                                                                                                                                                                                                                                                                                                                                                                                 |   |                                                                                                      |   |                                                                               |   |                                                            |   |                                                                          |   |                                                                                                             |   |                                       |   |       |
| 4  | Unknown                                                                                                             |                                                                                                |                                                                                                                                                                                                                                                                                                                                                                                                                                                                                                                                                                                                                 |   |                                                                                                      |   |                                                                               |   |                                                            |   |                                                                          |   |                                                                                                             |   |                                       |   |       |
| 20 | [ <b>thankyou_2</b> ]<br>Show the field ONLY if:<br>[intellect] = '2' or [intellect] = '3'                          | Thank you for your time!                                                                       | descriptive                                                                                                                                                                                                                                                                                                                                                                                                                                                                                                                                                                                                     |   |                                                                                                      |   |                                                                               |   |                                                            |   |                                                                          |   |                                                                                                             |   |                                       |   |       |
| 21 | [ <b>psych_disorder</b> ]<br>Show the field ONLY if:<br>[intellect] = '0' or [intellect] = '1' or [intellect] = '4' | Have you ever been diagnosed with a psychological disorder?<br><i>e.g. depression, anxiety</i> | dropdown<br><table border="1"> <tr> <td>0</td> <td>No</td> </tr> <tr> <td>1</td> <td>Yes (please specify)</td> </tr> </table>                                                                                                                                                                                                                                                                                                                                                                                                                                                                                   | 0 | No                                                                                                   | 1 | Yes (please specify)                                                          |   |                                                            |   |                                                                          |   |                                                                                                             |   |                                       |   |       |
| 0  | No                                                                                                                  |                                                                                                |                                                                                                                                                                                                                                                                                                                                                                                                                                                                                                                                                                                                                 |   |                                                                                                      |   |                                                                               |   |                                                            |   |                                                                          |   |                                                                                                             |   |                                       |   |       |
| 1  | Yes (please specify)                                                                                                |                                                                                                |                                                                                                                                                                                                                                                                                                                                                                                                                                                                                                                                                                                                                 |   |                                                                                                      |   |                                                                               |   |                                                            |   |                                                                          |   |                                                                                                             |   |                                       |   |       |
| 22 | [ <b>psych_specify</b> ]<br>Show the field ONLY if:<br>[psych_disorder] = '1'                                       | If yes, please specify                                                                         | text                                                                                                                                                                                                                                                                                                                                                                                                                                                                                                                                                                                                            |   |                                                                                                      |   |                                                                               |   |                                                            |   |                                                                          |   |                                                                                                             |   |                                       |   |       |
| 23 | [ <b>psych_age</b> ]<br>Show the field ONLY if:<br>[psych_disorder] = '1'                                           | If yes, how old were you when you were diagnosed with a psychological disorder?                | text (number)                                                                                                                                                                                                                                                                                                                                                                                                                                                                                                                                                                                                   |   |                                                                                                      |   |                                                                               |   |                                                            |   |                                                                          |   |                                                                                                             |   |                                       |   |       |

|    |                                                                                                                        |                                                                                  |                                                                                                                                                                                                                                                                                                                                                                                                                                                                                                                                                                                            |   |                                                                           |   |                                                                                       |   |                                                                                         |   |                                                                |   |                                                                        |   |                               |   |                              |   |        |   |           |   |                             |    |         |
|----|------------------------------------------------------------------------------------------------------------------------|----------------------------------------------------------------------------------|--------------------------------------------------------------------------------------------------------------------------------------------------------------------------------------------------------------------------------------------------------------------------------------------------------------------------------------------------------------------------------------------------------------------------------------------------------------------------------------------------------------------------------------------------------------------------------------------|---|---------------------------------------------------------------------------|---|---------------------------------------------------------------------------------------|---|-----------------------------------------------------------------------------------------|---|----------------------------------------------------------------|---|------------------------------------------------------------------------|---|-------------------------------|---|------------------------------|---|--------|---|-----------|---|-----------------------------|----|---------|
| 24 | [ <b>psych_managed1</b> ]<br>Show the field ONLY if:<br>[psych_disorder] = '1'                                         | On a scale of 1-5 how well do you feel your psychological symptoms are managed?  | radio<br><table border="1"> <tr><td>1</td><td>1 - Very well managed - experiencing no symptoms</td></tr> <tr><td>2</td><td>2 - Well managed</td></tr> <tr><td>3</td><td>3 - Sometimes well managed</td></tr> <tr><td>4</td><td>4 - Not well managed</td></tr> <tr><td>5</td><td>5 - Very poorly managed</td></tr> </table>                                                                                                                                                                                                                                                                 | 1 | 1 - Very well managed - experiencing no symptoms                          | 2 | 2 - Well managed                                                                      | 3 | 3 - Sometimes well managed                                                              | 4 | 4 - Not well managed                                           | 5 | 5 - Very poorly managed                                                |   |                               |   |                              |   |        |   |           |   |                             |    |         |
| 1  | 1 - Very well managed - experiencing no symptoms                                                                       |                                                                                  |                                                                                                                                                                                                                                                                                                                                                                                                                                                                                                                                                                                            |   |                                                                           |   |                                                                                       |   |                                                                                         |   |                                                                |   |                                                                        |   |                               |   |                              |   |        |   |           |   |                             |    |         |
| 2  | 2 - Well managed                                                                                                       |                                                                                  |                                                                                                                                                                                                                                                                                                                                                                                                                                                                                                                                                                                            |   |                                                                           |   |                                                                                       |   |                                                                                         |   |                                                                |   |                                                                        |   |                               |   |                              |   |        |   |           |   |                             |    |         |
| 3  | 3 - Sometimes well managed                                                                                             |                                                                                  |                                                                                                                                                                                                                                                                                                                                                                                                                                                                                                                                                                                            |   |                                                                           |   |                                                                                       |   |                                                                                         |   |                                                                |   |                                                                        |   |                               |   |                              |   |        |   |           |   |                             |    |         |
| 4  | 4 - Not well managed                                                                                                   |                                                                                  |                                                                                                                                                                                                                                                                                                                                                                                                                                                                                                                                                                                            |   |                                                                           |   |                                                                                       |   |                                                                                         |   |                                                                |   |                                                                        |   |                               |   |                              |   |        |   |           |   |                             |    |         |
| 5  | 5 - Very poorly managed                                                                                                |                                                                                  |                                                                                                                                                                                                                                                                                                                                                                                                                                                                                                                                                                                            |   |                                                                           |   |                                                                                       |   |                                                                                         |   |                                                                |   |                                                                        |   |                               |   |                              |   |        |   |           |   |                             |    |         |
| 25 | [ <b>cp_type</b> ]<br>Show the field ONLY if:<br>[intellect] = '0' or [intellect] = '1' or [intellect] = '4'           | Primary motor type of cerebral palsy?                                            | dropdown, Required<br><table border="1"> <tr><td>0</td><td>Left hemiplegia/monoplegia</td></tr> <tr><td>1</td><td>Right hemiplegia/monoplegia</td></tr> <tr><td>2</td><td>Diplegia</td></tr> <tr><td>3</td><td>Triplegia</td></tr> <tr><td>4</td><td>Quadriplegia</td></tr> <tr><td>5</td><td>Dyskinesia - mainly athetosis</td></tr> <tr><td>6</td><td>Dyskinesia - mainly dystonia</td></tr> <tr><td>7</td><td>Ataxia</td></tr> <tr><td>8</td><td>Hypotonia</td></tr> <tr><td>9</td><td>Mixed type (please specify)</td></tr> <tr><td>10</td><td>Unknown</td></tr> </table>              | 0 | Left hemiplegia/monoplegia                                                | 1 | Right hemiplegia/monoplegia                                                           | 2 | Diplegia                                                                                | 3 | Triplegia                                                      | 4 | Quadriplegia                                                           | 5 | Dyskinesia - mainly athetosis | 6 | Dyskinesia - mainly dystonia | 7 | Ataxia | 8 | Hypotonia | 9 | Mixed type (please specify) | 10 | Unknown |
| 0  | Left hemiplegia/monoplegia                                                                                             |                                                                                  |                                                                                                                                                                                                                                                                                                                                                                                                                                                                                                                                                                                            |   |                                                                           |   |                                                                                       |   |                                                                                         |   |                                                                |   |                                                                        |   |                               |   |                              |   |        |   |           |   |                             |    |         |
| 1  | Right hemiplegia/monoplegia                                                                                            |                                                                                  |                                                                                                                                                                                                                                                                                                                                                                                                                                                                                                                                                                                            |   |                                                                           |   |                                                                                       |   |                                                                                         |   |                                                                |   |                                                                        |   |                               |   |                              |   |        |   |           |   |                             |    |         |
| 2  | Diplegia                                                                                                               |                                                                                  |                                                                                                                                                                                                                                                                                                                                                                                                                                                                                                                                                                                            |   |                                                                           |   |                                                                                       |   |                                                                                         |   |                                                                |   |                                                                        |   |                               |   |                              |   |        |   |           |   |                             |    |         |
| 3  | Triplegia                                                                                                              |                                                                                  |                                                                                                                                                                                                                                                                                                                                                                                                                                                                                                                                                                                            |   |                                                                           |   |                                                                                       |   |                                                                                         |   |                                                                |   |                                                                        |   |                               |   |                              |   |        |   |           |   |                             |    |         |
| 4  | Quadriplegia                                                                                                           |                                                                                  |                                                                                                                                                                                                                                                                                                                                                                                                                                                                                                                                                                                            |   |                                                                           |   |                                                                                       |   |                                                                                         |   |                                                                |   |                                                                        |   |                               |   |                              |   |        |   |           |   |                             |    |         |
| 5  | Dyskinesia - mainly athetosis                                                                                          |                                                                                  |                                                                                                                                                                                                                                                                                                                                                                                                                                                                                                                                                                                            |   |                                                                           |   |                                                                                       |   |                                                                                         |   |                                                                |   |                                                                        |   |                               |   |                              |   |        |   |           |   |                             |    |         |
| 6  | Dyskinesia - mainly dystonia                                                                                           |                                                                                  |                                                                                                                                                                                                                                                                                                                                                                                                                                                                                                                                                                                            |   |                                                                           |   |                                                                                       |   |                                                                                         |   |                                                                |   |                                                                        |   |                               |   |                              |   |        |   |           |   |                             |    |         |
| 7  | Ataxia                                                                                                                 |                                                                                  |                                                                                                                                                                                                                                                                                                                                                                                                                                                                                                                                                                                            |   |                                                                           |   |                                                                                       |   |                                                                                         |   |                                                                |   |                                                                        |   |                               |   |                              |   |        |   |           |   |                             |    |         |
| 8  | Hypotonia                                                                                                              |                                                                                  |                                                                                                                                                                                                                                                                                                                                                                                                                                                                                                                                                                                            |   |                                                                           |   |                                                                                       |   |                                                                                         |   |                                                                |   |                                                                        |   |                               |   |                              |   |        |   |           |   |                             |    |         |
| 9  | Mixed type (please specify)                                                                                            |                                                                                  |                                                                                                                                                                                                                                                                                                                                                                                                                                                                                                                                                                                            |   |                                                                           |   |                                                                                       |   |                                                                                         |   |                                                                |   |                                                                        |   |                               |   |                              |   |        |   |           |   |                             |    |         |
| 10 | Unknown                                                                                                                |                                                                                  |                                                                                                                                                                                                                                                                                                                                                                                                                                                                                                                                                                                            |   |                                                                           |   |                                                                                       |   |                                                                                         |   |                                                                |   |                                                                        |   |                               |   |                              |   |        |   |           |   |                             |    |         |
| 26 | [ <b>mixed_type_specify</b> ]<br>Show the field ONLY if:<br>[cp_type] = '9'                                            | Please specify:                                                                  | text                                                                                                                                                                                                                                                                                                                                                                                                                                                                                                                                                                                       |   |                                                                           |   |                                                                                       |   |                                                                                         |   |                                                                |   |                                                                        |   |                               |   |                              |   |        |   |           |   |                             |    |         |
| 27 | [ <b>cfcs</b> ]<br>Show the field ONLY if:<br>[intellect] = '0' or [intellect] = '1' or [intellect] = '4'              | Ability to communicate (using any technique e.g. speech, communication aid etc.) | dropdown<br><table border="1"> <tr><td>1</td><td>Effective communicator with unfamiliar and familiar people (CFCS Level I)</td></tr> <tr><td>2</td><td>Effective but slower communicator with familiar and unfamiliar people (CFCS Level II)</td></tr> <tr><td>3</td><td>Effective communicator with familiar people (CFCS Level III)</td></tr> <tr><td>4</td><td>Inconsistent communicator with familiar people (CFCS Level IV)</td></tr> <tr><td>5</td><td>Seldom effective communicator even with familiar people (CFCS Level V)</td></tr> <tr><td>6</td><td>Unknown</td></tr> </table> | 1 | Effective communicator with unfamiliar and familiar people (CFCS Level I) | 2 | Effective but slower communicator with familiar and unfamiliar people (CFCS Level II) | 3 | Effective communicator with familiar people (CFCS Level III)                            | 4 | Inconsistent communicator with familiar people (CFCS Level IV) | 5 | Seldom effective communicator even with familiar people (CFCS Level V) | 6 | Unknown                       |   |                              |   |        |   |           |   |                             |    |         |
| 1  | Effective communicator with unfamiliar and familiar people (CFCS Level I)                                              |                                                                                  |                                                                                                                                                                                                                                                                                                                                                                                                                                                                                                                                                                                            |   |                                                                           |   |                                                                                       |   |                                                                                         |   |                                                                |   |                                                                        |   |                               |   |                              |   |        |   |           |   |                             |    |         |
| 2  | Effective but slower communicator with familiar and unfamiliar people (CFCS Level II)                                  |                                                                                  |                                                                                                                                                                                                                                                                                                                                                                                                                                                                                                                                                                                            |   |                                                                           |   |                                                                                       |   |                                                                                         |   |                                                                |   |                                                                        |   |                               |   |                              |   |        |   |           |   |                             |    |         |
| 3  | Effective communicator with familiar people (CFCS Level III)                                                           |                                                                                  |                                                                                                                                                                                                                                                                                                                                                                                                                                                                                                                                                                                            |   |                                                                           |   |                                                                                       |   |                                                                                         |   |                                                                |   |                                                                        |   |                               |   |                              |   |        |   |           |   |                             |    |         |
| 4  | Inconsistent communicator with familiar people (CFCS Level IV)                                                         |                                                                                  |                                                                                                                                                                                                                                                                                                                                                                                                                                                                                                                                                                                            |   |                                                                           |   |                                                                                       |   |                                                                                         |   |                                                                |   |                                                                        |   |                               |   |                              |   |        |   |           |   |                             |    |         |
| 5  | Seldom effective communicator even with familiar people (CFCS Level V)                                                 |                                                                                  |                                                                                                                                                                                                                                                                                                                                                                                                                                                                                                                                                                                            |   |                                                                           |   |                                                                                       |   |                                                                                         |   |                                                                |   |                                                                        |   |                               |   |                              |   |        |   |           |   |                             |    |         |
| 6  | Unknown                                                                                                                |                                                                                  |                                                                                                                                                                                                                                                                                                                                                                                                                                                                                                                                                                                            |   |                                                                           |   |                                                                                       |   |                                                                                         |   |                                                                |   |                                                                        |   |                               |   |                              |   |        |   |           |   |                             |    |         |
| 28 | [ <b>speech</b> ]<br>Show the field ONLY if:<br>[intellect] = '0' or [intellect] = '1' or [intellect] = '4'            | Ability to speak                                                                 | dropdown<br><table border="1"> <tr><td>1</td><td>Speech is not affected by motor disorder</td></tr> <tr><td>2</td><td>Speech is imprecise but usually understandable to unfamiliar listeners</td></tr> <tr><td>3</td><td>Speech is unclear and not usually understandable to unfamiliar listeners out of context</td></tr> <tr><td>4</td><td>No understandable speech not speak</td></tr> </table>                                                                                                                                                                                         | 1 | Speech is not affected by motor disorder                                  | 2 | Speech is imprecise but usually understandable to unfamiliar listeners                | 3 | Speech is unclear and not usually understandable to unfamiliar listeners out of context | 4 | No understandable speech not speak                             |   |                                                                        |   |                               |   |                              |   |        |   |           |   |                             |    |         |
| 1  | Speech is not affected by motor disorder                                                                               |                                                                                  |                                                                                                                                                                                                                                                                                                                                                                                                                                                                                                                                                                                            |   |                                                                           |   |                                                                                       |   |                                                                                         |   |                                                                |   |                                                                        |   |                               |   |                              |   |        |   |           |   |                             |    |         |
| 2  | Speech is imprecise but usually understandable to unfamiliar listeners                                                 |                                                                                  |                                                                                                                                                                                                                                                                                                                                                                                                                                                                                                                                                                                            |   |                                                                           |   |                                                                                       |   |                                                                                         |   |                                                                |   |                                                                        |   |                               |   |                              |   |        |   |           |   |                             |    |         |
| 3  | Speech is unclear and not usually understandable to unfamiliar listeners out of context                                |                                                                                  |                                                                                                                                                                                                                                                                                                                                                                                                                                                                                                                                                                                            |   |                                                                           |   |                                                                                       |   |                                                                                         |   |                                                                |   |                                                                        |   |                               |   |                              |   |        |   |           |   |                             |    |         |
| 4  | No understandable speech not speak                                                                                     |                                                                                  |                                                                                                                                                                                                                                                                                                                                                                                                                                                                                                                                                                                            |   |                                                                           |   |                                                                                       |   |                                                                                         |   |                                                                |   |                                                                        |   |                               |   |                              |   |        |   |           |   |                             |    |         |
| 29 | [ <b>communication_aid</b> ]<br>Show the field ONLY if:<br>[intellect] = '0' or [intellect] = '1' or [intellect] = '4' | Do you use an augmentative and alternative communication system?                 | dropdown<br><table border="1"> <tr><td>0</td><td>No</td></tr> <tr><td>1</td><td>Yes</td></tr> </table>                                                                                                                                                                                                                                                                                                                                                                                                                                                                                     | 0 | No                                                                        | 1 | Yes                                                                                   |   |                                                                                         |   |                                                                |   |                                                                        |   |                               |   |                              |   |        |   |           |   |                             |    |         |
| 0  | No                                                                                                                     |                                                                                  |                                                                                                                                                                                                                                                                                                                                                                                                                                                                                                                                                                                            |   |                                                                           |   |                                                                                       |   |                                                                                         |   |                                                                |   |                                                                        |   |                               |   |                              |   |        |   |           |   |                             |    |         |
| 1  | Yes                                                                                                                    |                                                                                  |                                                                                                                                                                                                                                                                                                                                                                                                                                                                                                                                                                                            |   |                                                                           |   |                                                                                       |   |                                                                                         |   |                                                                |   |                                                                        |   |                               |   |                              |   |        |   |           |   |                             |    |         |
| 30 | [ <b>tech_type</b> ]<br>Show the field ONLY if:<br>[communication_aid] = '1'                                           | Is it:                                                                           | radio<br><table border="1"> <tr><td>0</td><td>Low tech (gestures, sign language, communication board)</td></tr> <tr><td>1</td><td>High tech (voice output communication system)</td></tr> </table>                                                                                                                                                                                                                                                                                                                                                                                         | 0 | Low tech (gestures, sign language, communication board)                   | 1 | High tech (voice output communication system)                                         |   |                                                                                         |   |                                                                |   |                                                                        |   |                               |   |                              |   |        |   |           |   |                             |    |         |
| 0  | Low tech (gestures, sign language, communication board)                                                                |                                                                                  |                                                                                                                                                                                                                                                                                                                                                                                                                                                                                                                                                                                            |   |                                                                           |   |                                                                                       |   |                                                                                         |   |                                                                |   |                                                                        |   |                               |   |                              |   |        |   |           |   |                             |    |         |
| 1  | High tech (voice output communication system)                                                                          |                                                                                  |                                                                                                                                                                                                                                                                                                                                                                                                                                                                                                                                                                                            |   |                                                                           |   |                                                                                       |   |                                                                                         |   |                                                                |   |                                                                        |   |                               |   |                              |   |        |   |           |   |                             |    |         |
| 31 | [ <b>access_aid</b> ]<br>Show the field ONLY if:<br>[tech_type] = '1'                                                  | How do you access it?                                                            | dropdown<br><table border="1"> <tr><td>0</td><td>Direct</td></tr> <tr><td>1</td><td>Eye-gaze</td></tr> <tr><td>2</td><td>Switch scanning</td></tr> <tr><td>3</td><td>Other (please specify below)</td></tr> </table>                                                                                                                                                                                                                                                                                                                                                                       | 0 | Direct                                                                    | 1 | Eye-gaze                                                                              | 2 | Switch scanning                                                                         | 3 | Other (please specify below)                                   |   |                                                                        |   |                               |   |                              |   |        |   |           |   |                             |    |         |
| 0  | Direct                                                                                                                 |                                                                                  |                                                                                                                                                                                                                                                                                                                                                                                                                                                                                                                                                                                            |   |                                                                           |   |                                                                                       |   |                                                                                         |   |                                                                |   |                                                                        |   |                               |   |                              |   |        |   |           |   |                             |    |         |
| 1  | Eye-gaze                                                                                                               |                                                                                  |                                                                                                                                                                                                                                                                                                                                                                                                                                                                                                                                                                                            |   |                                                                           |   |                                                                                       |   |                                                                                         |   |                                                                |   |                                                                        |   |                               |   |                              |   |        |   |           |   |                             |    |         |
| 2  | Switch scanning                                                                                                        |                                                                                  |                                                                                                                                                                                                                                                                                                                                                                                                                                                                                                                                                                                            |   |                                                                           |   |                                                                                       |   |                                                                                         |   |                                                                |   |                                                                        |   |                               |   |                              |   |        |   |           |   |                             |    |         |
| 3  | Other (please specify below)                                                                                           |                                                                                  |                                                                                                                                                                                                                                                                                                                                                                                                                                                                                                                                                                                            |   |                                                                           |   |                                                                                       |   |                                                                                         |   |                                                                |   |                                                                        |   |                               |   |                              |   |        |   |           |   |                             |    |         |

|    |                                                                                                                          |                                                                                                |                                                                                                                                                                                                                                                                                                |   |              |   |           |   |                     |   |                  |   |               |
|----|--------------------------------------------------------------------------------------------------------------------------|------------------------------------------------------------------------------------------------|------------------------------------------------------------------------------------------------------------------------------------------------------------------------------------------------------------------------------------------------------------------------------------------------|---|--------------|---|-----------|---|---------------------|---|------------------|---|---------------|
| 32 | <div>[ other_aid_specify ]</div> <div>Show the field ONLY if:<br/>[access_aid] = '3'</div>                               | Please specify:                                                                                | text                                                                                                                                                                                                                                                                                           |   |              |   |           |   |                     |   |                  |   |               |
| 33 | <div>[ ders ]</div> <div>Show the field ONLY if:<br/>[intellect] = '0' or [intellect] = '1' or [intellect] = '4'</div>   | Please indicate how often the 36 statements apply to you by selecting the appropriate response | descriptive, Required                                                                                                                                                                                                                                                                          |   |              |   |           |   |                     |   |                  |   |               |
| 34 | <div>[ ders_1 ]</div> <div>Show the field ONLY if:<br/>[intellect] = '0' or [intellect] = '1' or [intellect] = '4'</div> | 1. I am clear about my feelings                                                                | <div>dropdown, Required</div> <table><tr><td>1</td><td>Almost never</td></tr><tr><td>2</td><td>Sometimes</td></tr><tr><td>3</td><td>About half the time</td></tr><tr><td>4</td><td>Most of the time</td></tr><tr><td>5</td><td>Almost always</td></tr></table> <div>Custom alignment: RH</div> | 1 | Almost never | 2 | Sometimes | 3 | About half the time | 4 | Most of the time | 5 | Almost always |
| 1  | Almost never                                                                                                             |                                                                                                |                                                                                                                                                                                                                                                                                                |   |              |   |           |   |                     |   |                  |   |               |
| 2  | Sometimes                                                                                                                |                                                                                                |                                                                                                                                                                                                                                                                                                |   |              |   |           |   |                     |   |                  |   |               |
| 3  | About half the time                                                                                                      |                                                                                                |                                                                                                                                                                                                                                                                                                |   |              |   |           |   |                     |   |                  |   |               |
| 4  | Most of the time                                                                                                         |                                                                                                |                                                                                                                                                                                                                                                                                                |   |              |   |           |   |                     |   |                  |   |               |
| 5  | Almost always                                                                                                            |                                                                                                |                                                                                                                                                                                                                                                                                                |   |              |   |           |   |                     |   |                  |   |               |
| 35 | <div>[ ders_2 ]</div> <div>Show the field ONLY if:<br/>[intellect] = '0' or [intellect] = '1' or [intellect] = '4'</div> | 2. I pay attention to how I feel                                                               | <div>dropdown, Required</div> <table><tr><td>1</td><td>Almost never</td></tr><tr><td>2</td><td>Sometimes</td></tr><tr><td>3</td><td>About half the time</td></tr><tr><td>4</td><td>Most of the time</td></tr><tr><td>5</td><td>Almost always</td></tr></table> <div>Custom alignment: RH</div> | 1 | Almost never | 2 | Sometimes | 3 | About half the time | 4 | Most of the time | 5 | Almost always |
| 1  | Almost never                                                                                                             |                                                                                                |                                                                                                                                                                                                                                                                                                |   |              |   |           |   |                     |   |                  |   |               |
| 2  | Sometimes                                                                                                                |                                                                                                |                                                                                                                                                                                                                                                                                                |   |              |   |           |   |                     |   |                  |   |               |
| 3  | About half the time                                                                                                      |                                                                                                |                                                                                                                                                                                                                                                                                                |   |              |   |           |   |                     |   |                  |   |               |
| 4  | Most of the time                                                                                                         |                                                                                                |                                                                                                                                                                                                                                                                                                |   |              |   |           |   |                     |   |                  |   |               |
| 5  | Almost always                                                                                                            |                                                                                                |                                                                                                                                                                                                                                                                                                |   |              |   |           |   |                     |   |                  |   |               |
| 36 | <div>[ ders_3 ]</div> <div>Show the field ONLY if:<br/>[intellect] = '0' or [intellect] = '1' or [intellect] = '4'</div> | 3. I experience my emotions as overwhelming and out of control                                 | <div>dropdown, Required</div> <table><tr><td>1</td><td>Almost never</td></tr><tr><td>2</td><td>Sometimes</td></tr><tr><td>3</td><td>About half the time</td></tr><tr><td>4</td><td>Most of the time</td></tr><tr><td>5</td><td>Almost always</td></tr></table> <div>Custom alignment: RH</div> | 1 | Almost never | 2 | Sometimes | 3 | About half the time | 4 | Most of the time | 5 | Almost always |
| 1  | Almost never                                                                                                             |                                                                                                |                                                                                                                                                                                                                                                                                                |   |              |   |           |   |                     |   |                  |   |               |
| 2  | Sometimes                                                                                                                |                                                                                                |                                                                                                                                                                                                                                                                                                |   |              |   |           |   |                     |   |                  |   |               |
| 3  | About half the time                                                                                                      |                                                                                                |                                                                                                                                                                                                                                                                                                |   |              |   |           |   |                     |   |                  |   |               |
| 4  | Most of the time                                                                                                         |                                                                                                |                                                                                                                                                                                                                                                                                                |   |              |   |           |   |                     |   |                  |   |               |
| 5  | Almost always                                                                                                            |                                                                                                |                                                                                                                                                                                                                                                                                                |   |              |   |           |   |                     |   |                  |   |               |
| 37 | <div>[ ders_4 ]</div> <div>Show the field ONLY if:<br/>[intellect] = '0' or [intellect] = '1' or [intellect] = '4'</div> | 4. I have no idea how I am feeling                                                             | <div>dropdown, Required</div> <table><tr><td>1</td><td>Almost never</td></tr><tr><td>2</td><td>Sometimes</td></tr><tr><td>3</td><td>About half the time</td></tr><tr><td>4</td><td>Most of the time</td></tr><tr><td>5</td><td>Almost always</td></tr></table> <div>Custom alignment: RH</div> | 1 | Almost never | 2 | Sometimes | 3 | About half the time | 4 | Most of the time | 5 | Almost always |
| 1  | Almost never                                                                                                             |                                                                                                |                                                                                                                                                                                                                                                                                                |   |              |   |           |   |                     |   |                  |   |               |
| 2  | Sometimes                                                                                                                |                                                                                                |                                                                                                                                                                                                                                                                                                |   |              |   |           |   |                     |   |                  |   |               |
| 3  | About half the time                                                                                                      |                                                                                                |                                                                                                                                                                                                                                                                                                |   |              |   |           |   |                     |   |                  |   |               |
| 4  | Most of the time                                                                                                         |                                                                                                |                                                                                                                                                                                                                                                                                                |   |              |   |           |   |                     |   |                  |   |               |
| 5  | Almost always                                                                                                            |                                                                                                |                                                                                                                                                                                                                                                                                                |   |              |   |           |   |                     |   |                  |   |               |
| 38 | <div>[ ders_5 ]</div> <div>Show the field ONLY if:<br/>[intellect] = '0' or [intellect] = '1' or [intellect] = '4'</div> | 5. I have difficulty making sense out of my feelings                                           | <div>dropdown, Required</div> <table><tr><td>1</td><td>Almost never</td></tr><tr><td>2</td><td>Sometimes</td></tr><tr><td>3</td><td>About half the time</td></tr><tr><td>4</td><td>Most of the time</td></tr><tr><td>5</td><td>Almost always</td></tr></table> <div>Custom alignment: RH</div> | 1 | Almost never | 2 | Sometimes | 3 | About half the time | 4 | Most of the time | 5 | Almost always |
| 1  | Almost never                                                                                                             |                                                                                                |                                                                                                                                                                                                                                                                                                |   |              |   |           |   |                     |   |                  |   |               |
| 2  | Sometimes                                                                                                                |                                                                                                |                                                                                                                                                                                                                                                                                                |   |              |   |           |   |                     |   |                  |   |               |
| 3  | About half the time                                                                                                      |                                                                                                |                                                                                                                                                                                                                                                                                                |   |              |   |           |   |                     |   |                  |   |               |
| 4  | Most of the time                                                                                                         |                                                                                                |                                                                                                                                                                                                                                                                                                |   |              |   |           |   |                     |   |                  |   |               |
| 5  | Almost always                                                                                                            |                                                                                                |                                                                                                                                                                                                                                                                                                |   |              |   |           |   |                     |   |                  |   |               |
| 39 | <div>[ ders_6 ]</div> <div>Show the field ONLY if:<br/>[intellect] = '0' or [intellect] = '1' or [intellect] = '4'</div> | 6. I am attentive to my feelings                                                               | <div>dropdown, Required</div> <table><tr><td>1</td><td>Almost never</td></tr><tr><td>2</td><td>Sometimes</td></tr><tr><td>3</td><td>About half the time</td></tr><tr><td>4</td><td>Most of the time</td></tr><tr><td>5</td><td>Almost always</td></tr></table> <div>Custom alignment: RH</div> | 1 | Almost never | 2 | Sometimes | 3 | About half the time | 4 | Most of the time | 5 | Almost always |
| 1  | Almost never                                                                                                             |                                                                                                |                                                                                                                                                                                                                                                                                                |   |              |   |           |   |                     |   |                  |   |               |
| 2  | Sometimes                                                                                                                |                                                                                                |                                                                                                                                                                                                                                                                                                |   |              |   |           |   |                     |   |                  |   |               |
| 3  | About half the time                                                                                                      |                                                                                                |                                                                                                                                                                                                                                                                                                |   |              |   |           |   |                     |   |                  |   |               |
| 4  | Most of the time                                                                                                         |                                                                                                |                                                                                                                                                                                                                                                                                                |   |              |   |           |   |                     |   |                  |   |               |
| 5  | Almost always                                                                                                            |                                                                                                |                                                                                                                                                                                                                                                                                                |   |              |   |           |   |                     |   |                  |   |               |

|    |                                                                                                                           |                                                                     |                                                                                                                                                                                                                                                                                                |   |              |   |           |   |                     |   |                  |   |               |
|----|---------------------------------------------------------------------------------------------------------------------------|---------------------------------------------------------------------|------------------------------------------------------------------------------------------------------------------------------------------------------------------------------------------------------------------------------------------------------------------------------------------------|---|--------------|---|-----------|---|---------------------|---|------------------|---|---------------|
| 40 | <div>[ ders_7 ]</div> <div>Show the field ONLY if:<br/>[intellect] = '0' or [intellect] = '1' or [intellect] = '4'</div>  | 7. I know exactly how I am feeling                                  | <div>dropdown, Required</div> <table><tr><td>1</td><td>Almost never</td></tr><tr><td>2</td><td>Sometimes</td></tr><tr><td>3</td><td>About half the time</td></tr><tr><td>4</td><td>Most of the time</td></tr><tr><td>5</td><td>Almost always</td></tr></table> <div>Custom alignment: RH</div> | 1 | Almost never | 2 | Sometimes | 3 | About half the time | 4 | Most of the time | 5 | Almost always |
| 1  | Almost never                                                                                                              |                                                                     |                                                                                                                                                                                                                                                                                                |   |              |   |           |   |                     |   |                  |   |               |
| 2  | Sometimes                                                                                                                 |                                                                     |                                                                                                                                                                                                                                                                                                |   |              |   |           |   |                     |   |                  |   |               |
| 3  | About half the time                                                                                                       |                                                                     |                                                                                                                                                                                                                                                                                                |   |              |   |           |   |                     |   |                  |   |               |
| 4  | Most of the time                                                                                                          |                                                                     |                                                                                                                                                                                                                                                                                                |   |              |   |           |   |                     |   |                  |   |               |
| 5  | Almost always                                                                                                             |                                                                     |                                                                                                                                                                                                                                                                                                |   |              |   |           |   |                     |   |                  |   |               |
| 41 | <div>[ ders_8 ]</div> <div>Show the field ONLY if:<br/>[intellect] = '0' or [intellect] = '1' or [intellect] = '4'</div>  | 8. I care about what I am feeling                                   | <div>dropdown, Required</div> <table><tr><td>1</td><td>Almost never</td></tr><tr><td>2</td><td>Sometimes</td></tr><tr><td>3</td><td>About half the time</td></tr><tr><td>4</td><td>Most of the time</td></tr><tr><td>5</td><td>Almost always</td></tr></table> <div>Custom alignment: RH</div> | 1 | Almost never | 2 | Sometimes | 3 | About half the time | 4 | Most of the time | 5 | Almost always |
| 1  | Almost never                                                                                                              |                                                                     |                                                                                                                                                                                                                                                                                                |   |              |   |           |   |                     |   |                  |   |               |
| 2  | Sometimes                                                                                                                 |                                                                     |                                                                                                                                                                                                                                                                                                |   |              |   |           |   |                     |   |                  |   |               |
| 3  | About half the time                                                                                                       |                                                                     |                                                                                                                                                                                                                                                                                                |   |              |   |           |   |                     |   |                  |   |               |
| 4  | Most of the time                                                                                                          |                                                                     |                                                                                                                                                                                                                                                                                                |   |              |   |           |   |                     |   |                  |   |               |
| 5  | Almost always                                                                                                             |                                                                     |                                                                                                                                                                                                                                                                                                |   |              |   |           |   |                     |   |                  |   |               |
| 42 | <div>[ ders_9 ]</div> <div>Show the field ONLY if:<br/>[intellect] = '0' or [intellect] = '1' or [intellect] = '4'</div>  | 9. I am confused about how I feel                                   | <div>dropdown, Required</div> <table><tr><td>1</td><td>Almost never</td></tr><tr><td>2</td><td>Sometimes</td></tr><tr><td>3</td><td>About half the time</td></tr><tr><td>4</td><td>Most of the time</td></tr><tr><td>5</td><td>Almost always</td></tr></table> <div>Custom alignment: RH</div> | 1 | Almost never | 2 | Sometimes | 3 | About half the time | 4 | Most of the time | 5 | Almost always |
| 1  | Almost never                                                                                                              |                                                                     |                                                                                                                                                                                                                                                                                                |   |              |   |           |   |                     |   |                  |   |               |
| 2  | Sometimes                                                                                                                 |                                                                     |                                                                                                                                                                                                                                                                                                |   |              |   |           |   |                     |   |                  |   |               |
| 3  | About half the time                                                                                                       |                                                                     |                                                                                                                                                                                                                                                                                                |   |              |   |           |   |                     |   |                  |   |               |
| 4  | Most of the time                                                                                                          |                                                                     |                                                                                                                                                                                                                                                                                                |   |              |   |           |   |                     |   |                  |   |               |
| 5  | Almost always                                                                                                             |                                                                     |                                                                                                                                                                                                                                                                                                |   |              |   |           |   |                     |   |                  |   |               |
| 43 | <div>[ ders_10 ]</div> <div>Show the field ONLY if:<br/>[intellect] = '0' or [intellect] = '1' or [intellect] = '4'</div> | 10. When I'm upset, I acknowledge my emotions                       | <div>dropdown, Required</div> <table><tr><td>1</td><td>Almost never</td></tr><tr><td>2</td><td>Sometimes</td></tr><tr><td>3</td><td>About half the time</td></tr><tr><td>4</td><td>Most of the time</td></tr><tr><td>5</td><td>Almost always</td></tr></table> <div>Custom alignment: RH</div> | 1 | Almost never | 2 | Sometimes | 3 | About half the time | 4 | Most of the time | 5 | Almost always |
| 1  | Almost never                                                                                                              |                                                                     |                                                                                                                                                                                                                                                                                                |   |              |   |           |   |                     |   |                  |   |               |
| 2  | Sometimes                                                                                                                 |                                                                     |                                                                                                                                                                                                                                                                                                |   |              |   |           |   |                     |   |                  |   |               |
| 3  | About half the time                                                                                                       |                                                                     |                                                                                                                                                                                                                                                                                                |   |              |   |           |   |                     |   |                  |   |               |
| 4  | Most of the time                                                                                                          |                                                                     |                                                                                                                                                                                                                                                                                                |   |              |   |           |   |                     |   |                  |   |               |
| 5  | Almost always                                                                                                             |                                                                     |                                                                                                                                                                                                                                                                                                |   |              |   |           |   |                     |   |                  |   |               |
| 44 | <div>[ ders_11 ]</div> <div>Show the field ONLY if:<br/>[intellect] = '0' or [intellect] = '1' or [intellect] = '4'</div> | 11. When I'm upset, I become angry with myself for feeling that way | <div>dropdown, Required</div> <table><tr><td>1</td><td>Almost never</td></tr><tr><td>2</td><td>Sometimes</td></tr><tr><td>3</td><td>About half the time</td></tr><tr><td>4</td><td>Most of the time</td></tr><tr><td>5</td><td>Almost always</td></tr></table> <div>Custom alignment: RH</div> | 1 | Almost never | 2 | Sometimes | 3 | About half the time | 4 | Most of the time | 5 | Almost always |
| 1  | Almost never                                                                                                              |                                                                     |                                                                                                                                                                                                                                                                                                |   |              |   |           |   |                     |   |                  |   |               |
| 2  | Sometimes                                                                                                                 |                                                                     |                                                                                                                                                                                                                                                                                                |   |              |   |           |   |                     |   |                  |   |               |
| 3  | About half the time                                                                                                       |                                                                     |                                                                                                                                                                                                                                                                                                |   |              |   |           |   |                     |   |                  |   |               |
| 4  | Most of the time                                                                                                          |                                                                     |                                                                                                                                                                                                                                                                                                |   |              |   |           |   |                     |   |                  |   |               |
| 5  | Almost always                                                                                                             |                                                                     |                                                                                                                                                                                                                                                                                                |   |              |   |           |   |                     |   |                  |   |               |
| 45 | <div>[ ders_12 ]</div> <div>Show the field ONLY if:<br/>[intellect] = '0' or [intellect] = '1' or [intellect] = '4'</div> | 12. When I'm upset, I become embarrassed for feeling that way       | <div>dropdown, Required</div> <table><tr><td>1</td><td>Almost never</td></tr><tr><td>2</td><td>Sometimes</td></tr><tr><td>3</td><td>About half the time</td></tr><tr><td>4</td><td>Most of the time</td></tr><tr><td>5</td><td>Almost always</td></tr></table> <div>Custom alignment: RH</div> | 1 | Almost never | 2 | Sometimes | 3 | About half the time | 4 | Most of the time | 5 | Almost always |
| 1  | Almost never                                                                                                              |                                                                     |                                                                                                                                                                                                                                                                                                |   |              |   |           |   |                     |   |                  |   |               |
| 2  | Sometimes                                                                                                                 |                                                                     |                                                                                                                                                                                                                                                                                                |   |              |   |           |   |                     |   |                  |   |               |
| 3  | About half the time                                                                                                       |                                                                     |                                                                                                                                                                                                                                                                                                |   |              |   |           |   |                     |   |                  |   |               |
| 4  | Most of the time                                                                                                          |                                                                     |                                                                                                                                                                                                                                                                                                |   |              |   |           |   |                     |   |                  |   |               |
| 5  | Almost always                                                                                                             |                                                                     |                                                                                                                                                                                                                                                                                                |   |              |   |           |   |                     |   |                  |   |               |
| 46 | <div>[ ders_13 ]</div> <div>Show the field ONLY if:<br/>[intellect] = '0' or [intellect] = '1' or [intellect] = '4'</div> | 13. When I'm upset, I have difficulty getting work done             | <div>dropdown, Required</div> <table><tr><td>1</td><td>Almost never</td></tr><tr><td>2</td><td>Sometimes</td></tr><tr><td>3</td><td>About half the time</td></tr><tr><td>4</td><td>Most of the time</td></tr><tr><td>5</td><td>Almost always</td></tr></table> <div>Custom alignment: RH</div> | 1 | Almost never | 2 | Sometimes | 3 | About half the time | 4 | Most of the time | 5 | Almost always |
| 1  | Almost never                                                                                                              |                                                                     |                                                                                                                                                                                                                                                                                                |   |              |   |           |   |                     |   |                  |   |               |
| 2  | Sometimes                                                                                                                 |                                                                     |                                                                                                                                                                                                                                                                                                |   |              |   |           |   |                     |   |                  |   |               |
| 3  | About half the time                                                                                                       |                                                                     |                                                                                                                                                                                                                                                                                                |   |              |   |           |   |                     |   |                  |   |               |
| 4  | Most of the time                                                                                                          |                                                                     |                                                                                                                                                                                                                                                                                                |   |              |   |           |   |                     |   |                  |   |               |
| 5  | Almost always                                                                                                             |                                                                     |                                                                                                                                                                                                                                                                                                |   |              |   |           |   |                     |   |                  |   |               |

|    |                                                                                                                           |                                                                           |                                                                                                                                                                                                                                                                                                |   |              |   |           |   |                     |   |                  |   |               |
|----|---------------------------------------------------------------------------------------------------------------------------|---------------------------------------------------------------------------|------------------------------------------------------------------------------------------------------------------------------------------------------------------------------------------------------------------------------------------------------------------------------------------------|---|--------------|---|-----------|---|---------------------|---|------------------|---|---------------|
| 47 | <div>[ ders_14 ]</div> <div>Show the field ONLY if:<br/>[intellect] = '0' or [intellect] = '1' or [intellect] = '4'</div> | 14. When I'm upset, I become out of control                               | <div>dropdown, Required</div> <table><tr><td>1</td><td>Almost never</td></tr><tr><td>2</td><td>Sometimes</td></tr><tr><td>3</td><td>About half the time</td></tr><tr><td>4</td><td>Most of the time</td></tr><tr><td>5</td><td>Almost always</td></tr></table> <div>Custom alignment: RH</div> | 1 | Almost never | 2 | Sometimes | 3 | About half the time | 4 | Most of the time | 5 | Almost always |
| 1  | Almost never                                                                                                              |                                                                           |                                                                                                                                                                                                                                                                                                |   |              |   |           |   |                     |   |                  |   |               |
| 2  | Sometimes                                                                                                                 |                                                                           |                                                                                                                                                                                                                                                                                                |   |              |   |           |   |                     |   |                  |   |               |
| 3  | About half the time                                                                                                       |                                                                           |                                                                                                                                                                                                                                                                                                |   |              |   |           |   |                     |   |                  |   |               |
| 4  | Most of the time                                                                                                          |                                                                           |                                                                                                                                                                                                                                                                                                |   |              |   |           |   |                     |   |                  |   |               |
| 5  | Almost always                                                                                                             |                                                                           |                                                                                                                                                                                                                                                                                                |   |              |   |           |   |                     |   |                  |   |               |
| 48 | <div>[ ders_15 ]</div> <div>Show the field ONLY if:<br/>[intellect] = '0' or [intellect] = '1' or [intellect] = '4'</div> | 15. When I'm upset, I believe that I will remain that way for a long time | <div>dropdown, Required</div> <table><tr><td>1</td><td>Almost never</td></tr><tr><td>2</td><td>Sometimes</td></tr><tr><td>3</td><td>About half the time</td></tr><tr><td>4</td><td>Most of the time</td></tr><tr><td>5</td><td>Almost always</td></tr></table> <div>Custom alignment: RH</div> | 1 | Almost never | 2 | Sometimes | 3 | About half the time | 4 | Most of the time | 5 | Almost always |
| 1  | Almost never                                                                                                              |                                                                           |                                                                                                                                                                                                                                                                                                |   |              |   |           |   |                     |   |                  |   |               |
| 2  | Sometimes                                                                                                                 |                                                                           |                                                                                                                                                                                                                                                                                                |   |              |   |           |   |                     |   |                  |   |               |
| 3  | About half the time                                                                                                       |                                                                           |                                                                                                                                                                                                                                                                                                |   |              |   |           |   |                     |   |                  |   |               |
| 4  | Most of the time                                                                                                          |                                                                           |                                                                                                                                                                                                                                                                                                |   |              |   |           |   |                     |   |                  |   |               |
| 5  | Almost always                                                                                                             |                                                                           |                                                                                                                                                                                                                                                                                                |   |              |   |           |   |                     |   |                  |   |               |
| 49 | <div>[ ders_16 ]</div> <div>Show the field ONLY if:<br/>[intellect] = '0' or [intellect] = '1' or [intellect] = '4'</div> | 16. When I'm upset, I believe that I'll end up feeling very depressed     | <div>dropdown, Required</div> <table><tr><td>1</td><td>Almost never</td></tr><tr><td>2</td><td>Sometimes</td></tr><tr><td>3</td><td>About half the time</td></tr><tr><td>4</td><td>Most of the time</td></tr><tr><td>5</td><td>Almost always</td></tr></table> <div>Custom alignment: RH</div> | 1 | Almost never | 2 | Sometimes | 3 | About half the time | 4 | Most of the time | 5 | Almost always |
| 1  | Almost never                                                                                                              |                                                                           |                                                                                                                                                                                                                                                                                                |   |              |   |           |   |                     |   |                  |   |               |
| 2  | Sometimes                                                                                                                 |                                                                           |                                                                                                                                                                                                                                                                                                |   |              |   |           |   |                     |   |                  |   |               |
| 3  | About half the time                                                                                                       |                                                                           |                                                                                                                                                                                                                                                                                                |   |              |   |           |   |                     |   |                  |   |               |
| 4  | Most of the time                                                                                                          |                                                                           |                                                                                                                                                                                                                                                                                                |   |              |   |           |   |                     |   |                  |   |               |
| 5  | Almost always                                                                                                             |                                                                           |                                                                                                                                                                                                                                                                                                |   |              |   |           |   |                     |   |                  |   |               |
| 50 | <div>[ ders_17 ]</div> <div>Show the field ONLY if:<br/>[intellect] = '0' or [intellect] = '1' or [intellect] = '4'</div> | 17. When I'm upset, I believe that my feelings are valid and important    | <div>dropdown, Required</div> <table><tr><td>1</td><td>Almost never</td></tr><tr><td>2</td><td>Sometimes</td></tr><tr><td>3</td><td>About half the time</td></tr><tr><td>4</td><td>Most of the time</td></tr><tr><td>5</td><td>Almost always</td></tr></table> <div>Custom alignment: RH</div> | 1 | Almost never | 2 | Sometimes | 3 | About half the time | 4 | Most of the time | 5 | Almost always |
| 1  | Almost never                                                                                                              |                                                                           |                                                                                                                                                                                                                                                                                                |   |              |   |           |   |                     |   |                  |   |               |
| 2  | Sometimes                                                                                                                 |                                                                           |                                                                                                                                                                                                                                                                                                |   |              |   |           |   |                     |   |                  |   |               |
| 3  | About half the time                                                                                                       |                                                                           |                                                                                                                                                                                                                                                                                                |   |              |   |           |   |                     |   |                  |   |               |
| 4  | Most of the time                                                                                                          |                                                                           |                                                                                                                                                                                                                                                                                                |   |              |   |           |   |                     |   |                  |   |               |
| 5  | Almost always                                                                                                             |                                                                           |                                                                                                                                                                                                                                                                                                |   |              |   |           |   |                     |   |                  |   |               |
| 51 | <div>[ ders_18 ]</div> <div>Show the field ONLY if:<br/>[intellect] = '0' or [intellect] = '1' or [intellect] = '4'</div> | 18. When I'm upset, I have difficulty focusing on other things            | <div>dropdown, Required</div> <table><tr><td>1</td><td>Almost never</td></tr><tr><td>2</td><td>Sometimes</td></tr><tr><td>3</td><td>About half the time</td></tr><tr><td>4</td><td>Most of the time</td></tr><tr><td>5</td><td>Almost always</td></tr></table> <div>Custom alignment: RH</div> | 1 | Almost never | 2 | Sometimes | 3 | About half the time | 4 | Most of the time | 5 | Almost always |
| 1  | Almost never                                                                                                              |                                                                           |                                                                                                                                                                                                                                                                                                |   |              |   |           |   |                     |   |                  |   |               |
| 2  | Sometimes                                                                                                                 |                                                                           |                                                                                                                                                                                                                                                                                                |   |              |   |           |   |                     |   |                  |   |               |
| 3  | About half the time                                                                                                       |                                                                           |                                                                                                                                                                                                                                                                                                |   |              |   |           |   |                     |   |                  |   |               |
| 4  | Most of the time                                                                                                          |                                                                           |                                                                                                                                                                                                                                                                                                |   |              |   |           |   |                     |   |                  |   |               |
| 5  | Almost always                                                                                                             |                                                                           |                                                                                                                                                                                                                                                                                                |   |              |   |           |   |                     |   |                  |   |               |
| 52 | <div>[ ders_19 ]</div> <div>Show the field ONLY if:<br/>[intellect] = '0' or [intellect] = '1' or [intellect] = '4'</div> | 19. When I'm upset, I feel out of control                                 | <div>dropdown, Required</div> <table><tr><td>1</td><td>Almost never</td></tr><tr><td>2</td><td>Sometimes</td></tr><tr><td>3</td><td>About half the time</td></tr><tr><td>4</td><td>Most of the time</td></tr><tr><td>5</td><td>Almost always</td></tr></table> <div>Custom alignment: RH</div> | 1 | Almost never | 2 | Sometimes | 3 | About half the time | 4 | Most of the time | 5 | Almost always |
| 1  | Almost never                                                                                                              |                                                                           |                                                                                                                                                                                                                                                                                                |   |              |   |           |   |                     |   |                  |   |               |
| 2  | Sometimes                                                                                                                 |                                                                           |                                                                                                                                                                                                                                                                                                |   |              |   |           |   |                     |   |                  |   |               |
| 3  | About half the time                                                                                                       |                                                                           |                                                                                                                                                                                                                                                                                                |   |              |   |           |   |                     |   |                  |   |               |
| 4  | Most of the time                                                                                                          |                                                                           |                                                                                                                                                                                                                                                                                                |   |              |   |           |   |                     |   |                  |   |               |
| 5  | Almost always                                                                                                             |                                                                           |                                                                                                                                                                                                                                                                                                |   |              |   |           |   |                     |   |                  |   |               |
| 53 | <div>[ ders_20 ]</div> <div>Show the field ONLY if:<br/>[intellect] = '0' or [intellect] = '1' or [intellect] = '4'</div> | 20. When I'm upset, I can still get things done                           | <div>dropdown, Required</div> <table><tr><td>1</td><td>Almost never</td></tr><tr><td>2</td><td>Sometimes</td></tr><tr><td>3</td><td>About half the time</td></tr><tr><td>4</td><td>Most of the time</td></tr><tr><td>5</td><td>Almost always</td></tr></table> <div>Custom alignment: RH</div> | 1 | Almost never | 2 | Sometimes | 3 | About half the time | 4 | Most of the time | 5 | Almost always |
| 1  | Almost never                                                                                                              |                                                                           |                                                                                                                                                                                                                                                                                                |   |              |   |           |   |                     |   |                  |   |               |
| 2  | Sometimes                                                                                                                 |                                                                           |                                                                                                                                                                                                                                                                                                |   |              |   |           |   |                     |   |                  |   |               |
| 3  | About half the time                                                                                                       |                                                                           |                                                                                                                                                                                                                                                                                                |   |              |   |           |   |                     |   |                  |   |               |
| 4  | Most of the time                                                                                                          |                                                                           |                                                                                                                                                                                                                                                                                                |   |              |   |           |   |                     |   |                  |   |               |
| 5  | Almost always                                                                                                             |                                                                           |                                                                                                                                                                                                                                                                                                |   |              |   |           |   |                     |   |                  |   |               |

|    |                                                                                                           |                                                                            |                                                                                                                                                                                                                                                                                |   |              |   |           |   |                     |   |                  |   |               |
|----|-----------------------------------------------------------------------------------------------------------|----------------------------------------------------------------------------|--------------------------------------------------------------------------------------------------------------------------------------------------------------------------------------------------------------------------------------------------------------------------------|---|--------------|---|-----------|---|---------------------|---|------------------|---|---------------|
| 54 | [ ders_21 ]<br><br>Show the field ONLY if:<br>[intellect] = '0' or [intellect] = '1' or [intellect] = '4' | 21. When I'm upset, I feel ashamed with myself for feeling that way        | dropdown, Required<br><table><tr><td>1</td><td>Almost never</td></tr><tr><td>2</td><td>Sometimes</td></tr><tr><td>3</td><td>About half the time</td></tr><tr><td>4</td><td>Most of the time</td></tr><tr><td>5</td><td>Almost always</td></tr></table><br>Custom alignment: RH | 1 | Almost never | 2 | Sometimes | 3 | About half the time | 4 | Most of the time | 5 | Almost always |
| 1  | Almost never                                                                                              |                                                                            |                                                                                                                                                                                                                                                                                |   |              |   |           |   |                     |   |                  |   |               |
| 2  | Sometimes                                                                                                 |                                                                            |                                                                                                                                                                                                                                                                                |   |              |   |           |   |                     |   |                  |   |               |
| 3  | About half the time                                                                                       |                                                                            |                                                                                                                                                                                                                                                                                |   |              |   |           |   |                     |   |                  |   |               |
| 4  | Most of the time                                                                                          |                                                                            |                                                                                                                                                                                                                                                                                |   |              |   |           |   |                     |   |                  |   |               |
| 5  | Almost always                                                                                             |                                                                            |                                                                                                                                                                                                                                                                                |   |              |   |           |   |                     |   |                  |   |               |
| 55 | [ ders_22 ]<br><br>Show the field ONLY if:<br>[intellect] = '0' or [intellect] = '1' or [intellect] = '4' | 22. When I'm upset, I know that I can find a way to eventually feel better | dropdown, Required<br><table><tr><td>1</td><td>Almost never</td></tr><tr><td>2</td><td>Sometimes</td></tr><tr><td>3</td><td>About half the time</td></tr><tr><td>4</td><td>Most of the time</td></tr><tr><td>5</td><td>Almost always</td></tr></table><br>Custom alignment: RH | 1 | Almost never | 2 | Sometimes | 3 | About half the time | 4 | Most of the time | 5 | Almost always |
| 1  | Almost never                                                                                              |                                                                            |                                                                                                                                                                                                                                                                                |   |              |   |           |   |                     |   |                  |   |               |
| 2  | Sometimes                                                                                                 |                                                                            |                                                                                                                                                                                                                                                                                |   |              |   |           |   |                     |   |                  |   |               |
| 3  | About half the time                                                                                       |                                                                            |                                                                                                                                                                                                                                                                                |   |              |   |           |   |                     |   |                  |   |               |
| 4  | Most of the time                                                                                          |                                                                            |                                                                                                                                                                                                                                                                                |   |              |   |           |   |                     |   |                  |   |               |
| 5  | Almost always                                                                                             |                                                                            |                                                                                                                                                                                                                                                                                |   |              |   |           |   |                     |   |                  |   |               |
| 56 | [ ders_23 ]<br><br>Show the field ONLY if:<br>[intellect] = '0' or [intellect] = '1' or [intellect] = '4' | 23. When I'm upset, I feel like I am weak                                  | dropdown, Required<br><table><tr><td>1</td><td>Almost never</td></tr><tr><td>2</td><td>Sometimes</td></tr><tr><td>3</td><td>About half the time</td></tr><tr><td>4</td><td>Most of the time</td></tr><tr><td>5</td><td>Almost always</td></tr></table><br>Custom alignment: RH | 1 | Almost never | 2 | Sometimes | 3 | About half the time | 4 | Most of the time | 5 | Almost always |
| 1  | Almost never                                                                                              |                                                                            |                                                                                                                                                                                                                                                                                |   |              |   |           |   |                     |   |                  |   |               |
| 2  | Sometimes                                                                                                 |                                                                            |                                                                                                                                                                                                                                                                                |   |              |   |           |   |                     |   |                  |   |               |
| 3  | About half the time                                                                                       |                                                                            |                                                                                                                                                                                                                                                                                |   |              |   |           |   |                     |   |                  |   |               |
| 4  | Most of the time                                                                                          |                                                                            |                                                                                                                                                                                                                                                                                |   |              |   |           |   |                     |   |                  |   |               |
| 5  | Almost always                                                                                             |                                                                            |                                                                                                                                                                                                                                                                                |   |              |   |           |   |                     |   |                  |   |               |
| 57 | [ ders_24 ]<br><br>Show the field ONLY if:<br>[intellect] = '0' or [intellect] = '1' or [intellect] = '4' | 24. When I'm upset, I feel like I can remain in control of my behaviours   | dropdown, Required<br><table><tr><td>1</td><td>Almost never</td></tr><tr><td>2</td><td>Sometimes</td></tr><tr><td>3</td><td>About half the time</td></tr><tr><td>4</td><td>Most of the time</td></tr><tr><td>5</td><td>Almost always</td></tr></table><br>Custom alignment: RH | 1 | Almost never | 2 | Sometimes | 3 | About half the time | 4 | Most of the time | 5 | Almost always |
| 1  | Almost never                                                                                              |                                                                            |                                                                                                                                                                                                                                                                                |   |              |   |           |   |                     |   |                  |   |               |
| 2  | Sometimes                                                                                                 |                                                                            |                                                                                                                                                                                                                                                                                |   |              |   |           |   |                     |   |                  |   |               |
| 3  | About half the time                                                                                       |                                                                            |                                                                                                                                                                                                                                                                                |   |              |   |           |   |                     |   |                  |   |               |
| 4  | Most of the time                                                                                          |                                                                            |                                                                                                                                                                                                                                                                                |   |              |   |           |   |                     |   |                  |   |               |
| 5  | Almost always                                                                                             |                                                                            |                                                                                                                                                                                                                                                                                |   |              |   |           |   |                     |   |                  |   |               |
| 58 | [ ders_25 ]<br><br>Show the field ONLY if:<br>[intellect] = '0' or [intellect] = '1' or [intellect] = '4' | 25. When I'm upset, I feel guilty for feeling that way                     | dropdown, Required<br><table><tr><td>1</td><td>Almost never</td></tr><tr><td>2</td><td>Sometimes</td></tr><tr><td>3</td><td>About half the time</td></tr><tr><td>4</td><td>Most of the time</td></tr><tr><td>5</td><td>Almost always</td></tr></table><br>Custom alignment: RH | 1 | Almost never | 2 | Sometimes | 3 | About half the time | 4 | Most of the time | 5 | Almost always |
| 1  | Almost never                                                                                              |                                                                            |                                                                                                                                                                                                                                                                                |   |              |   |           |   |                     |   |                  |   |               |
| 2  | Sometimes                                                                                                 |                                                                            |                                                                                                                                                                                                                                                                                |   |              |   |           |   |                     |   |                  |   |               |
| 3  | About half the time                                                                                       |                                                                            |                                                                                                                                                                                                                                                                                |   |              |   |           |   |                     |   |                  |   |               |
| 4  | Most of the time                                                                                          |                                                                            |                                                                                                                                                                                                                                                                                |   |              |   |           |   |                     |   |                  |   |               |
| 5  | Almost always                                                                                             |                                                                            |                                                                                                                                                                                                                                                                                |   |              |   |           |   |                     |   |                  |   |               |
| 59 | [ ders_26 ]<br><br>Show the field ONLY if:<br>[intellect] = '0' or [intellect] = '1' or [intellect] = '4' | 26. When I'm upset, I have difficulty concentrating                        | dropdown, Required<br><table><tr><td>1</td><td>Almost never</td></tr><tr><td>2</td><td>Sometimes</td></tr><tr><td>3</td><td>About half the time</td></tr><tr><td>4</td><td>Most of the time</td></tr><tr><td>5</td><td>Almost always</td></tr></table><br>Custom alignment: RH | 1 | Almost never | 2 | Sometimes | 3 | About half the time | 4 | Most of the time | 5 | Almost always |
| 1  | Almost never                                                                                              |                                                                            |                                                                                                                                                                                                                                                                                |   |              |   |           |   |                     |   |                  |   |               |
| 2  | Sometimes                                                                                                 |                                                                            |                                                                                                                                                                                                                                                                                |   |              |   |           |   |                     |   |                  |   |               |
| 3  | About half the time                                                                                       |                                                                            |                                                                                                                                                                                                                                                                                |   |              |   |           |   |                     |   |                  |   |               |
| 4  | Most of the time                                                                                          |                                                                            |                                                                                                                                                                                                                                                                                |   |              |   |           |   |                     |   |                  |   |               |
| 5  | Almost always                                                                                             |                                                                            |                                                                                                                                                                                                                                                                                |   |              |   |           |   |                     |   |                  |   |               |
| 60 | [ ders_27 ]<br><br>Show the field ONLY if:<br>[intellect] = '0' or [intellect] = '1' or [intellect] = '4' | 27. When I'm upset, I have difficulty controlling my behaviours            | dropdown, Required<br><table><tr><td>1</td><td>Almost never</td></tr><tr><td>2</td><td>Sometimes</td></tr><tr><td>3</td><td>About half the time</td></tr><tr><td>4</td><td>Most of the time</td></tr><tr><td>5</td><td>Almost always</td></tr></table><br>Custom alignment: RH | 1 | Almost never | 2 | Sometimes | 3 | About half the time | 4 | Most of the time | 5 | Almost always |
| 1  | Almost never                                                                                              |                                                                            |                                                                                                                                                                                                                                                                                |   |              |   |           |   |                     |   |                  |   |               |
| 2  | Sometimes                                                                                                 |                                                                            |                                                                                                                                                                                                                                                                                |   |              |   |           |   |                     |   |                  |   |               |
| 3  | About half the time                                                                                       |                                                                            |                                                                                                                                                                                                                                                                                |   |              |   |           |   |                     |   |                  |   |               |
| 4  | Most of the time                                                                                          |                                                                            |                                                                                                                                                                                                                                                                                |   |              |   |           |   |                     |   |                  |   |               |
| 5  | Almost always                                                                                             |                                                                            |                                                                                                                                                                                                                                                                                |   |              |   |           |   |                     |   |                  |   |               |

|    |                                                                                                                           |                                                                                    |                                                                                                                                                                                                                                                                                                |   |              |   |           |   |                     |   |                  |   |               |
|----|---------------------------------------------------------------------------------------------------------------------------|------------------------------------------------------------------------------------|------------------------------------------------------------------------------------------------------------------------------------------------------------------------------------------------------------------------------------------------------------------------------------------------|---|--------------|---|-----------|---|---------------------|---|------------------|---|---------------|
| 61 | <div>[ ders_28 ]</div> <div>Show the field ONLY if:<br/>[intellect] = '0' or [intellect] = '1' or [intellect] = '4'</div> | 28. When I'm upset, I believe there is nothing I can do to make myself feel better | <div>dropdown, Required</div> <table><tr><td>1</td><td>Almost never</td></tr><tr><td>2</td><td>Sometimes</td></tr><tr><td>3</td><td>About half the time</td></tr><tr><td>4</td><td>Most of the time</td></tr><tr><td>5</td><td>Almost always</td></tr></table> <div>Custom alignment: RH</div> | 1 | Almost never | 2 | Sometimes | 3 | About half the time | 4 | Most of the time | 5 | Almost always |
| 1  | Almost never                                                                                                              |                                                                                    |                                                                                                                                                                                                                                                                                                |   |              |   |           |   |                     |   |                  |   |               |
| 2  | Sometimes                                                                                                                 |                                                                                    |                                                                                                                                                                                                                                                                                                |   |              |   |           |   |                     |   |                  |   |               |
| 3  | About half the time                                                                                                       |                                                                                    |                                                                                                                                                                                                                                                                                                |   |              |   |           |   |                     |   |                  |   |               |
| 4  | Most of the time                                                                                                          |                                                                                    |                                                                                                                                                                                                                                                                                                |   |              |   |           |   |                     |   |                  |   |               |
| 5  | Almost always                                                                                                             |                                                                                    |                                                                                                                                                                                                                                                                                                |   |              |   |           |   |                     |   |                  |   |               |
| 62 | <div>[ ders_29 ]</div> <div>Show the field ONLY if:<br/>[intellect] = '0' or [intellect] = '1' or [intellect] = '4'</div> | 29. When I'm upset, I become irritated with myself for feeling that way            | <div>dropdown, Required</div> <table><tr><td>1</td><td>Almost never</td></tr><tr><td>2</td><td>Sometimes</td></tr><tr><td>3</td><td>About half the time</td></tr><tr><td>4</td><td>Most of the time</td></tr><tr><td>5</td><td>Almost always</td></tr></table> <div>Custom alignment: RH</div> | 1 | Almost never | 2 | Sometimes | 3 | About half the time | 4 | Most of the time | 5 | Almost always |
| 1  | Almost never                                                                                                              |                                                                                    |                                                                                                                                                                                                                                                                                                |   |              |   |           |   |                     |   |                  |   |               |
| 2  | Sometimes                                                                                                                 |                                                                                    |                                                                                                                                                                                                                                                                                                |   |              |   |           |   |                     |   |                  |   |               |
| 3  | About half the time                                                                                                       |                                                                                    |                                                                                                                                                                                                                                                                                                |   |              |   |           |   |                     |   |                  |   |               |
| 4  | Most of the time                                                                                                          |                                                                                    |                                                                                                                                                                                                                                                                                                |   |              |   |           |   |                     |   |                  |   |               |
| 5  | Almost always                                                                                                             |                                                                                    |                                                                                                                                                                                                                                                                                                |   |              |   |           |   |                     |   |                  |   |               |
| 63 | <div>[ ders_30 ]</div> <div>Show the field ONLY if:<br/>[intellect] = '0' or [intellect] = '1' or [intellect] = '4'</div> | 30. When I'm upset, I start to feel very bad about myself                          | <div>dropdown, Required</div> <table><tr><td>1</td><td>Almost never</td></tr><tr><td>2</td><td>Sometimes</td></tr><tr><td>3</td><td>About half the time</td></tr><tr><td>4</td><td>Most of the time</td></tr><tr><td>5</td><td>Almost always</td></tr></table> <div>Custom alignment: RH</div> | 1 | Almost never | 2 | Sometimes | 3 | About half the time | 4 | Most of the time | 5 | Almost always |
| 1  | Almost never                                                                                                              |                                                                                    |                                                                                                                                                                                                                                                                                                |   |              |   |           |   |                     |   |                  |   |               |
| 2  | Sometimes                                                                                                                 |                                                                                    |                                                                                                                                                                                                                                                                                                |   |              |   |           |   |                     |   |                  |   |               |
| 3  | About half the time                                                                                                       |                                                                                    |                                                                                                                                                                                                                                                                                                |   |              |   |           |   |                     |   |                  |   |               |
| 4  | Most of the time                                                                                                          |                                                                                    |                                                                                                                                                                                                                                                                                                |   |              |   |           |   |                     |   |                  |   |               |
| 5  | Almost always                                                                                                             |                                                                                    |                                                                                                                                                                                                                                                                                                |   |              |   |           |   |                     |   |                  |   |               |
| 64 | <div>[ ders_31 ]</div> <div>Show the field ONLY if:<br/>[intellect] = '0' or [intellect] = '1' or [intellect] = '4'</div> | 31. When I'm upset, I believe that wallowing in it is all I can do                 | <div>dropdown, Required</div> <table><tr><td>1</td><td>Almost never</td></tr><tr><td>2</td><td>Sometimes</td></tr><tr><td>3</td><td>About half the time</td></tr><tr><td>4</td><td>Most of the time</td></tr><tr><td>5</td><td>Almost always</td></tr></table> <div>Custom alignment: RH</div> | 1 | Almost never | 2 | Sometimes | 3 | About half the time | 4 | Most of the time | 5 | Almost always |
| 1  | Almost never                                                                                                              |                                                                                    |                                                                                                                                                                                                                                                                                                |   |              |   |           |   |                     |   |                  |   |               |
| 2  | Sometimes                                                                                                                 |                                                                                    |                                                                                                                                                                                                                                                                                                |   |              |   |           |   |                     |   |                  |   |               |
| 3  | About half the time                                                                                                       |                                                                                    |                                                                                                                                                                                                                                                                                                |   |              |   |           |   |                     |   |                  |   |               |
| 4  | Most of the time                                                                                                          |                                                                                    |                                                                                                                                                                                                                                                                                                |   |              |   |           |   |                     |   |                  |   |               |
| 5  | Almost always                                                                                                             |                                                                                    |                                                                                                                                                                                                                                                                                                |   |              |   |           |   |                     |   |                  |   |               |
| 65 | <div>[ ders_32 ]</div> <div>Show the field ONLY if:<br/>[intellect] = '0' or [intellect] = '1' or [intellect] = '4'</div> | 32. When I'm upset, I lose control over my behaviours                              | <div>dropdown, Required</div> <table><tr><td>1</td><td>Almost never</td></tr><tr><td>2</td><td>Sometimes</td></tr><tr><td>3</td><td>About half the time</td></tr><tr><td>4</td><td>Most of the time</td></tr><tr><td>5</td><td>Almost always</td></tr></table> <div>Custom alignment: RH</div> | 1 | Almost never | 2 | Sometimes | 3 | About half the time | 4 | Most of the time | 5 | Almost always |
| 1  | Almost never                                                                                                              |                                                                                    |                                                                                                                                                                                                                                                                                                |   |              |   |           |   |                     |   |                  |   |               |
| 2  | Sometimes                                                                                                                 |                                                                                    |                                                                                                                                                                                                                                                                                                |   |              |   |           |   |                     |   |                  |   |               |
| 3  | About half the time                                                                                                       |                                                                                    |                                                                                                                                                                                                                                                                                                |   |              |   |           |   |                     |   |                  |   |               |
| 4  | Most of the time                                                                                                          |                                                                                    |                                                                                                                                                                                                                                                                                                |   |              |   |           |   |                     |   |                  |   |               |
| 5  | Almost always                                                                                                             |                                                                                    |                                                                                                                                                                                                                                                                                                |   |              |   |           |   |                     |   |                  |   |               |
| 66 | <div>[ ders_33 ]</div> <div>Show the field ONLY if:<br/>[intellect] = '0' or [intellect] = '1' or [intellect] = '4'</div> | 33. When I'm upset, I have difficulty thinking about anything else                 | <div>dropdown, Required</div> <table><tr><td>1</td><td>Almost never</td></tr><tr><td>2</td><td>Sometimes</td></tr><tr><td>3</td><td>About half the time</td></tr><tr><td>4</td><td>Most of the time</td></tr><tr><td>5</td><td>Almost always</td></tr></table> <div>Custom alignment: RH</div> | 1 | Almost never | 2 | Sometimes | 3 | About half the time | 4 | Most of the time | 5 | Almost always |
| 1  | Almost never                                                                                                              |                                                                                    |                                                                                                                                                                                                                                                                                                |   |              |   |           |   |                     |   |                  |   |               |
| 2  | Sometimes                                                                                                                 |                                                                                    |                                                                                                                                                                                                                                                                                                |   |              |   |           |   |                     |   |                  |   |               |
| 3  | About half the time                                                                                                       |                                                                                    |                                                                                                                                                                                                                                                                                                |   |              |   |           |   |                     |   |                  |   |               |
| 4  | Most of the time                                                                                                          |                                                                                    |                                                                                                                                                                                                                                                                                                |   |              |   |           |   |                     |   |                  |   |               |
| 5  | Almost always                                                                                                             |                                                                                    |                                                                                                                                                                                                                                                                                                |   |              |   |           |   |                     |   |                  |   |               |
| 67 | <div>[ ders_34 ]</div> <div>Show the field ONLY if:<br/>[intellect] = '0' or [intellect] = '1' or [intellect] = '4'</div> | 34. When I'm upset, I take time to figure out what I'm really feeling              | <div>dropdown, Required</div> <table><tr><td>1</td><td>Almost never</td></tr><tr><td>2</td><td>Sometimes</td></tr><tr><td>3</td><td>About half the time</td></tr><tr><td>4</td><td>Most of the time</td></tr><tr><td>5</td><td>Almost always</td></tr></table> <div>Custom alignment: RH</div> | 1 | Almost never | 2 | Sometimes | 3 | About half the time | 4 | Most of the time | 5 | Almost always |
| 1  | Almost never                                                                                                              |                                                                                    |                                                                                                                                                                                                                                                                                                |   |              |   |           |   |                     |   |                  |   |               |
| 2  | Sometimes                                                                                                                 |                                                                                    |                                                                                                                                                                                                                                                                                                |   |              |   |           |   |                     |   |                  |   |               |
| 3  | About half the time                                                                                                       |                                                                                    |                                                                                                                                                                                                                                                                                                |   |              |   |           |   |                     |   |                  |   |               |
| 4  | Most of the time                                                                                                          |                                                                                    |                                                                                                                                                                                                                                                                                                |   |              |   |           |   |                     |   |                  |   |               |
| 5  | Almost always                                                                                                             |                                                                                    |                                                                                                                                                                                                                                                                                                |   |              |   |           |   |                     |   |                  |   |               |

|    |                                                                                                       |                                                                                                                              |                                                                                                                                                                                                                                                                                                 |   |                                    |   |                              |   |                                 |   |                                  |   |               |
|----|-------------------------------------------------------------------------------------------------------|------------------------------------------------------------------------------------------------------------------------------|-------------------------------------------------------------------------------------------------------------------------------------------------------------------------------------------------------------------------------------------------------------------------------------------------|---|------------------------------------|---|------------------------------|---|---------------------------------|---|----------------------------------|---|---------------|
| 68 | [ ders_35 ]<br>Show the field ONLY if:<br>[intellect] = '0' or [intellect] = '1' or [intellect] = '4' | 35. When I'm upset, It takes me a long time to feel better                                                                   | dropdown, Required<br><table border="1"> <tr><td>1</td><td>Almost never</td></tr> <tr><td>2</td><td>Sometimes</td></tr> <tr><td>3</td><td>About half the time</td></tr> <tr><td>4</td><td>Most of the time</td></tr> <tr><td>5</td><td>Almost always</td></tr> </table> Custom alignment: RH    | 1 | Almost never                       | 2 | Sometimes                    | 3 | About half the time             | 4 | Most of the time                 | 5 | Almost always |
| 1  | Almost never                                                                                          |                                                                                                                              |                                                                                                                                                                                                                                                                                                 |   |                                    |   |                              |   |                                 |   |                                  |   |               |
| 2  | Sometimes                                                                                             |                                                                                                                              |                                                                                                                                                                                                                                                                                                 |   |                                    |   |                              |   |                                 |   |                                  |   |               |
| 3  | About half the time                                                                                   |                                                                                                                              |                                                                                                                                                                                                                                                                                                 |   |                                    |   |                              |   |                                 |   |                                  |   |               |
| 4  | Most of the time                                                                                      |                                                                                                                              |                                                                                                                                                                                                                                                                                                 |   |                                    |   |                              |   |                                 |   |                                  |   |               |
| 5  | Almost always                                                                                         |                                                                                                                              |                                                                                                                                                                                                                                                                                                 |   |                                    |   |                              |   |                                 |   |                                  |   |               |
| 69 | [ ders_36 ]<br>Show the field ONLY if:<br>[intellect] = '0' or [intellect] = '1' or [intellect] = '4' | 36. When I'm upset, my emotions feel overwhelming                                                                            | dropdown, Required<br><table border="1"> <tr><td>1</td><td>Almost never</td></tr> <tr><td>2</td><td>Sometimes</td></tr> <tr><td>3</td><td>About half the time</td></tr> <tr><td>4</td><td>Most of the time</td></tr> <tr><td>5</td><td>Almost always</td></tr> </table> Custom alignment: RH    | 1 | Almost never                       | 2 | Sometimes                    | 3 | About half the time             | 4 | Most of the time                 | 5 | Almost always |
| 1  | Almost never                                                                                          |                                                                                                                              |                                                                                                                                                                                                                                                                                                 |   |                                    |   |                              |   |                                 |   |                                  |   |               |
| 2  | Sometimes                                                                                             |                                                                                                                              |                                                                                                                                                                                                                                                                                                 |   |                                    |   |                              |   |                                 |   |                                  |   |               |
| 3  | About half the time                                                                                   |                                                                                                                              |                                                                                                                                                                                                                                                                                                 |   |                                    |   |                              |   |                                 |   |                                  |   |               |
| 4  | Most of the time                                                                                      |                                                                                                                              |                                                                                                                                                                                                                                                                                                 |   |                                    |   |                              |   |                                 |   |                                  |   |               |
| 5  | Almost always                                                                                         |                                                                                                                              |                                                                                                                                                                                                                                                                                                 |   |                                    |   |                              |   |                                 |   |                                  |   |               |
| 70 | [ dass ]<br>Show the field ONLY if:<br>[intellect] = '0' or [intellect] = '1' or [intellect] = '4'    | Please read each statement and select how much the statement applied to you over the past week                               | descriptive, Required                                                                                                                                                                                                                                                                           |   |                                    |   |                              |   |                                 |   |                                  |   |               |
| 71 | [ dass_1 ]<br>Show the field ONLY if:<br>[intellect] = '0' or [intellect] = '1' or [intellect] = '4'  | 1. I found it hard to wind down                                                                                              | radio, Required<br><table border="1"> <tr><td>0</td><td>NEVER - did not apply to me at all</td></tr> <tr><td>1</td><td>SOMETIMES - some of the time</td></tr> <tr><td>2</td><td>OFTEN - a good part of the time</td></tr> <tr><td>3</td><td>ALMOST ALWAYS - most of the time</td></tr> </table> | 0 | NEVER - did not apply to me at all | 1 | SOMETIMES - some of the time | 2 | OFTEN - a good part of the time | 3 | ALMOST ALWAYS - most of the time |   |               |
| 0  | NEVER - did not apply to me at all                                                                    |                                                                                                                              |                                                                                                                                                                                                                                                                                                 |   |                                    |   |                              |   |                                 |   |                                  |   |               |
| 1  | SOMETIMES - some of the time                                                                          |                                                                                                                              |                                                                                                                                                                                                                                                                                                 |   |                                    |   |                              |   |                                 |   |                                  |   |               |
| 2  | OFTEN - a good part of the time                                                                       |                                                                                                                              |                                                                                                                                                                                                                                                                                                 |   |                                    |   |                              |   |                                 |   |                                  |   |               |
| 3  | ALMOST ALWAYS - most of the time                                                                      |                                                                                                                              |                                                                                                                                                                                                                                                                                                 |   |                                    |   |                              |   |                                 |   |                                  |   |               |
| 72 | [ dass_2 ]<br>Show the field ONLY if:<br>[intellect] = '0' or [intellect] = '1' or [intellect] = '4'  | 2. I was aware of dryness of my mouth                                                                                        | radio, Required<br><table border="1"> <tr><td>0</td><td>NEVER - did not apply to me at all</td></tr> <tr><td>1</td><td>SOMETIMES - some of the time</td></tr> <tr><td>2</td><td>OFTEN - a good part of the time</td></tr> <tr><td>3</td><td>ALMOST ALWAYS - most of the time</td></tr> </table> | 0 | NEVER - did not apply to me at all | 1 | SOMETIMES - some of the time | 2 | OFTEN - a good part of the time | 3 | ALMOST ALWAYS - most of the time |   |               |
| 0  | NEVER - did not apply to me at all                                                                    |                                                                                                                              |                                                                                                                                                                                                                                                                                                 |   |                                    |   |                              |   |                                 |   |                                  |   |               |
| 1  | SOMETIMES - some of the time                                                                          |                                                                                                                              |                                                                                                                                                                                                                                                                                                 |   |                                    |   |                              |   |                                 |   |                                  |   |               |
| 2  | OFTEN - a good part of the time                                                                       |                                                                                                                              |                                                                                                                                                                                                                                                                                                 |   |                                    |   |                              |   |                                 |   |                                  |   |               |
| 3  | ALMOST ALWAYS - most of the time                                                                      |                                                                                                                              |                                                                                                                                                                                                                                                                                                 |   |                                    |   |                              |   |                                 |   |                                  |   |               |
| 73 | [ dass_3 ]<br>Show the field ONLY if:<br>[intellect] = '0' or [intellect] = '1' or [intellect] = '4'  | 3. I couldn't seem to experience any positive feeling at all                                                                 | radio, Required<br><table border="1"> <tr><td>0</td><td>NEVER - did not apply to me at all</td></tr> <tr><td>1</td><td>SOMETIMES - some of the time</td></tr> <tr><td>2</td><td>OFTEN - a good part of the time</td></tr> <tr><td>3</td><td>ALMOST ALWAYS - most of the time</td></tr> </table> | 0 | NEVER - did not apply to me at all | 1 | SOMETIMES - some of the time | 2 | OFTEN - a good part of the time | 3 | ALMOST ALWAYS - most of the time |   |               |
| 0  | NEVER - did not apply to me at all                                                                    |                                                                                                                              |                                                                                                                                                                                                                                                                                                 |   |                                    |   |                              |   |                                 |   |                                  |   |               |
| 1  | SOMETIMES - some of the time                                                                          |                                                                                                                              |                                                                                                                                                                                                                                                                                                 |   |                                    |   |                              |   |                                 |   |                                  |   |               |
| 2  | OFTEN - a good part of the time                                                                       |                                                                                                                              |                                                                                                                                                                                                                                                                                                 |   |                                    |   |                              |   |                                 |   |                                  |   |               |
| 3  | ALMOST ALWAYS - most of the time                                                                      |                                                                                                                              |                                                                                                                                                                                                                                                                                                 |   |                                    |   |                              |   |                                 |   |                                  |   |               |
| 74 | [ dass_4 ]<br>Show the field ONLY if:<br>[intellect] = '0' or [intellect] = '1' or [intellect] = '4'  | 4. I experienced breathing difficulty (e.g. excessively rapid breathing, breathlessness in the absence of physical exertion) | radio, Required<br><table border="1"> <tr><td>0</td><td>NEVER - did not apply to me at all</td></tr> <tr><td>1</td><td>SOMETIMES - some of the time</td></tr> <tr><td>2</td><td>OFTEN - a good part of the time</td></tr> <tr><td>3</td><td>ALMOST ALWAYS - most of the time</td></tr> </table> | 0 | NEVER - did not apply to me at all | 1 | SOMETIMES - some of the time | 2 | OFTEN - a good part of the time | 3 | ALMOST ALWAYS - most of the time |   |               |
| 0  | NEVER - did not apply to me at all                                                                    |                                                                                                                              |                                                                                                                                                                                                                                                                                                 |   |                                    |   |                              |   |                                 |   |                                  |   |               |
| 1  | SOMETIMES - some of the time                                                                          |                                                                                                                              |                                                                                                                                                                                                                                                                                                 |   |                                    |   |                              |   |                                 |   |                                  |   |               |
| 2  | OFTEN - a good part of the time                                                                       |                                                                                                                              |                                                                                                                                                                                                                                                                                                 |   |                                    |   |                              |   |                                 |   |                                  |   |               |
| 3  | ALMOST ALWAYS - most of the time                                                                      |                                                                                                                              |                                                                                                                                                                                                                                                                                                 |   |                                    |   |                              |   |                                 |   |                                  |   |               |
| 75 | [ dass_5 ]<br>Show the field ONLY if:<br>[intellect] = '0' or [intellect] = '1' or [intellect] = '4'  | 5. I found it difficult to work up the initiative to do things                                                               | radio, Required<br><table border="1"> <tr><td>0</td><td>NEVER - did not apply to me at all</td></tr> <tr><td>1</td><td>SOMETIMES - some of the time</td></tr> <tr><td>2</td><td>OFTEN - a good part of the time</td></tr> <tr><td>3</td><td>ALMOST ALWAYS - most of the time</td></tr> </table> | 0 | NEVER - did not apply to me at all | 1 | SOMETIMES - some of the time | 2 | OFTEN - a good part of the time | 3 | ALMOST ALWAYS - most of the time |   |               |
| 0  | NEVER - did not apply to me at all                                                                    |                                                                                                                              |                                                                                                                                                                                                                                                                                                 |   |                                    |   |                              |   |                                 |   |                                  |   |               |
| 1  | SOMETIMES - some of the time                                                                          |                                                                                                                              |                                                                                                                                                                                                                                                                                                 |   |                                    |   |                              |   |                                 |   |                                  |   |               |
| 2  | OFTEN - a good part of the time                                                                       |                                                                                                                              |                                                                                                                                                                                                                                                                                                 |   |                                    |   |                              |   |                                 |   |                                  |   |               |
| 3  | ALMOST ALWAYS - most of the time                                                                      |                                                                                                                              |                                                                                                                                                                                                                                                                                                 |   |                                    |   |                              |   |                                 |   |                                  |   |               |
| 76 | [ dass_6 ]<br>Show the field ONLY if:<br>[intellect] = '0' or [intellect] = '1' or [intellect] = '4'  | 6. I tended to over-react to situations                                                                                      | radio, Required<br><table border="1"> <tr><td>0</td><td>NEVER - did not apply to me at all</td></tr> <tr><td>1</td><td>SOMETIMES - some of the time</td></tr> <tr><td>2</td><td>OFTEN - a good part of the time</td></tr> <tr><td>3</td><td>ALMOST ALWAYS - most of the time</td></tr> </table> | 0 | NEVER - did not apply to me at all | 1 | SOMETIMES - some of the time | 2 | OFTEN - a good part of the time | 3 | ALMOST ALWAYS - most of the time |   |               |
| 0  | NEVER - did not apply to me at all                                                                    |                                                                                                                              |                                                                                                                                                                                                                                                                                                 |   |                                    |   |                              |   |                                 |   |                                  |   |               |
| 1  | SOMETIMES - some of the time                                                                          |                                                                                                                              |                                                                                                                                                                                                                                                                                                 |   |                                    |   |                              |   |                                 |   |                                  |   |               |
| 2  | OFTEN - a good part of the time                                                                       |                                                                                                                              |                                                                                                                                                                                                                                                                                                 |   |                                    |   |                              |   |                                 |   |                                  |   |               |
| 3  | ALMOST ALWAYS - most of the time                                                                      |                                                                                                                              |                                                                                                                                                                                                                                                                                                 |   |                                    |   |                              |   |                                 |   |                                  |   |               |
| 77 | [ dass_7 ]<br>Show the field ONLY if:<br>[intellect] = '0' or [intellect] = '1' or [intellect] = '4'  | 7. I experienced trembling (e.g. in the hands)                                                                               | radio, Required<br><table border="1"> <tr><td>0</td><td>NEVER - did not apply to me at all</td></tr> <tr><td>1</td><td>SOMETIMES - some of the time</td></tr> <tr><td>2</td><td>OFTEN - a good part of the time</td></tr> <tr><td>3</td><td>ALMOST ALWAYS - most of the time</td></tr> </table> | 0 | NEVER - did not apply to me at all | 1 | SOMETIMES - some of the time | 2 | OFTEN - a good part of the time | 3 | ALMOST ALWAYS - most of the time |   |               |
| 0  | NEVER - did not apply to me at all                                                                    |                                                                                                                              |                                                                                                                                                                                                                                                                                                 |   |                                    |   |                              |   |                                 |   |                                  |   |               |
| 1  | SOMETIMES - some of the time                                                                          |                                                                                                                              |                                                                                                                                                                                                                                                                                                 |   |                                    |   |                              |   |                                 |   |                                  |   |               |
| 2  | OFTEN - a good part of the time                                                                       |                                                                                                                              |                                                                                                                                                                                                                                                                                                 |   |                                    |   |                              |   |                                 |   |                                  |   |               |
| 3  | ALMOST ALWAYS - most of the time                                                                      |                                                                                                                              |                                                                                                                                                                                                                                                                                                 |   |                                    |   |                              |   |                                 |   |                                  |   |               |

|    |                                                                                                     |                                                                                     |                                                                                                                                                                      |
|----|-----------------------------------------------------------------------------------------------------|-------------------------------------------------------------------------------------|----------------------------------------------------------------------------------------------------------------------------------------------------------------------|
| 78 | [dass_8]<br>Show the field ONLY if:<br>[intellect] = '0' or [intellect] = '1' or [intellect] = '4'  | 8. I felt like I was using a lot of nervous energy                                  | radio, Required<br>0 NEVER - did not apply to me at all<br>1 SOMETIMES - some of the time<br>2 OFTEN - a good part of the time<br>3 ALMOST ALWAYS - most of the time |
| 79 | [dass_9]<br>Show the field ONLY if:<br>[intellect] = '0' or [intellect] = '1' or [intellect] = '4'  | 9. I was worried about situations in which I might panic and make a fool of myself  | radio, Required<br>0 NEVER - did not apply to me at all<br>1 SOMETIMES - some of the time<br>2 OFTEN - a good part of the time<br>3 ALMOST ALWAYS - most of the time |
| 80 | [dass_10]<br>Show the field ONLY if:<br>[intellect] = '0' or [intellect] = '1' or [intellect] = '4' | 10. I felt that I had nothing to look forward to                                    | radio, Required<br>0 NEVER - did not apply to me at all<br>1 SOMETIMES - some of the time<br>2 OFTEN - a good part of the time<br>3 ALMOST ALWAYS - most of the time |
| 81 | [dass_11]<br>Show the field ONLY if:<br>[intellect] = '0' or [intellect] = '1' or [intellect] = '4' | 11. I found myself getting agitated                                                 | radio, Required<br>0 NEVER - did not apply to me at all<br>1 SOMETIMES - some of the time<br>2 OFTEN - a good part of the time<br>3 ALMOST ALWAYS - most of the time |
| 82 | [dass_12]<br>Show the field ONLY if:<br>[intellect] = '0' or [intellect] = '1' or [intellect] = '4' | 12. I found it difficult to relax                                                   | radio, Required<br>0 NEVER - did not apply to me at all<br>1 SOMETIMES - some of the time<br>2 OFTEN - a good part of the time<br>3 ALMOST ALWAYS - most of the time |
| 83 | [dass_13]<br>Show the field ONLY if:<br>[intellect] = '0' or [intellect] = '1' or [intellect] = '4' | 13. I felt down-hearted and blue                                                    | radio, Required<br>0 NEVER - did not apply to me at all<br>1 SOMETIMES - some of the time<br>2 OFTEN - a good part of the time<br>3 ALMOST ALWAYS - most of the time |
| 84 | [dass_14]<br>Show the field ONLY if:<br>[intellect] = '0' or [intellect] = '1' or [intellect] = '4' | 14. I was intolerant of anything that kept me from getting on with what I was doing | radio, Required<br>0 NEVER - did not apply to me at all<br>1 SOMETIMES - some of the time<br>2 OFTEN - a good part of the time<br>3 ALMOST ALWAYS - most of the time |
| 85 | [dass_15]<br>Show the field ONLY if:<br>[intellect] = '0' or [intellect] = '1' or [intellect] = '4' | 15. I felt I was close to panic                                                     | radio, Required<br>0 NEVER - did not apply to me at all<br>1 SOMETIMES - some of the time<br>2 OFTEN - a good part of the time<br>3 ALMOST ALWAYS - most of the time |
| 86 | [dass_16]<br>Show the field ONLY if:<br>[intellect] = '0' or [intellect] = '1' or [intellect] = '4' | 16. I was unable to become enthusiastic about anything                              | radio, Required<br>0 NEVER - did not apply to me at all<br>1 SOMETIMES - some of the time<br>2 OFTEN - a good part of the time<br>3 ALMOST ALWAYS - most of the time |
| 87 | [dass_17]<br>Show the field ONLY if:<br>[intellect] = '0' or [intellect] = '1' or [intellect] = '4' | 17. I felt I wasn't worth much as a person                                          | radio, Required<br>0 NEVER - did not apply to me at all<br>1 SOMETIMES - some of the time<br>2 OFTEN - a good part of the time<br>3 ALMOST ALWAYS - most of the time |

|                                                                          |                                                                                                     |                                                                                                                                         |                                                                                                                                                                      |
|--------------------------------------------------------------------------|-----------------------------------------------------------------------------------------------------|-----------------------------------------------------------------------------------------------------------------------------------------|----------------------------------------------------------------------------------------------------------------------------------------------------------------------|
| 88                                                                       | [dass_18]<br>Show the field ONLY if:<br>[intellect] = '0' or [intellect] = '1' or [intellect] = '4' | 18. I felt that I was rather touchy                                                                                                     | radio, Required<br>0 NEVER - did not apply to me at all<br>1 SOMETIMES - some of the time<br>2 OFTEN - a good part of the time<br>3 ALMOST ALWAYS - most of the time |
| 89                                                                       | [dass_19]<br>Show the field ONLY if:<br>[intellect] = '0' or [intellect] = '1' or [intellect] = '4' | 19. I was aware of the action of my heart in the absence of physical exertion (e.g. sense of heart rate increase, heart missing a beat) | radio, Required<br>0 NEVER - did not apply to me at all<br>1 SOMETIMES - some of the time<br>2 OFTEN - a good part of the time<br>3 ALMOST ALWAYS - most of the time |
| 90                                                                       | [dass_20]<br>Show the field ONLY if:<br>[intellect] = '0' or [intellect] = '1' or [intellect] = '4' | 20. I felt scared without any good reason                                                                                               | radio, Required<br>0 NEVER - did not apply to me at all<br>1 SOMETIMES - some of the time<br>2 OFTEN - a good part of the time<br>3 ALMOST ALWAYS - most of the time |
| 91                                                                       | [dass_21]<br>Show the field ONLY if:<br>[intellect] = '0' or [intellect] = '1' or [intellect] = '4' | 21. I felt that life was meaningless                                                                                                    | radio, Required<br>0 NEVER - did not apply to me at all<br>1 SOMETIMES - some of the time<br>2 OFTEN - a good part of the time<br>3 ALMOST ALWAYS - most of the time |
| 92                                                                       | [support_services]<br>Show the field ONLY if:<br>[consent] = '1'                                    |                                                                                                                                         | descriptive                                                                                                                                                          |
| 93                                                                       | [emotion_regulation_complete]                                                                       | Section Header: <i>Form Status</i><br>Complete?                                                                                         | dropdown<br>0 Incomplete<br>1 Unverified<br>2 Complete                                                                                                               |
| <b>Instrument: Comments from researchers (comments_from_researchers)</b> |                                                                                                     |                                                                                                                                         |                                                                                                                                                                      |
| 94                                                                       | [research_comments]                                                                                 | Add any important details relating to this study                                                                                        | notes                                                                                                                                                                |
| 95                                                                       | [comments_from_researchers_complete]                                                                | Section Header: <i>Form Status</i><br>Complete?                                                                                         | dropdown<br>0 Incomplete<br>1 Unverified<br>2 Complete                                                                                                               |
